1 **Activation of Somatostatin Inhibitory Neurons by Lypd6-nAChRa2 System Restores Juvenile-**  
2 **like Plasticity in Adult Visual Cortex**

3

4 Masato Sadahiro<sup>1-5</sup>†, Michael P. Demars<sup>1-5</sup>†, Poromendro Burman<sup>1-5</sup>, Priscilla Yevo<sup>1-5</sup>, Milo R. Smith<sup>1-5</sup>,  
5 Andreas Zimmer<sup>6</sup>, Hirofumi Morishita<sup>1-5\*</sup>

6

7 <sup>1</sup> Department of Psychiatry, <sup>2</sup> Department of Neuroscience, <sup>3</sup> Department of Ophthalmology, <sup>4</sup> Mindich  
8 Child Health and Development Institute, <sup>5</sup> Friedman Brain Institute, Icahn School of Medicine at Mount  
9 Sinai, New York, NY 10029, USA

10 <sup>6</sup> Institute of Molecular Psychiatry, Medical Faculty, University of Bonn, Bonn 53127, Germany

11 \*Contact to: [hirofumi.morishita@mssm.edu](mailto:hirofumi.morishita@mssm.edu)

12 † M.S. and M.P.D. share co-first authorship

13

14

15

16

17

18

19

20

21

22

23 **Abstract**

24 Heightened juvenile cortical plasticity declines into adulthood, posing a challenge for functional  
25 recovery following brain injury or disease. A network of inhibition is critical for regulating plasticity in  
26 adulthood, yet contributions of specific interneurons other than parvalbumin (PV) interneurons have  
27 been underexplored. Here we show Lypd6, an endogenous positive modulator of nicotinic acetylcholine  
28 receptors (nAChRs), as a specific molecular target in somatostatin (SST) interneurons to reactivate  
29 cortical plasticity in adulthood. Selective overexpression of Lypd6 in adult SST interneurons reactivates  
30 plasticity through  $\alpha 2$  subtype of nAChR by rapidly activating SST interneurons which in turn inhibit PV  
31 interneurons, a key early trigger of the juvenile form of plasticity. Chemogenetic activation of SST  
32 interneurons confirmed the causal role of SST interneuron activity in reactivating plasticity. Identification  
33 of Lypd6-nAChR $\alpha 2$  system and associated SST-PV disinhibitory circuits as the first SST interneuron-  
34 specific targets for reactivation of plasticity in adulthood provides potential therapeutic insights into  
35 treating disorders with limited recovery due to diminished plasticity such as amblyopia as well as  
36 psychiatric disorders characterized by deficits in SST interneurons.

37

38

## 39 Introduction

40 Experience-dependent brain plasticity is heightened during juvenile critical periods but this  
41 declines into adulthood, which poses a major challenge to functional recovery following injury or  
42 disease later in life <sup>1,2</sup>. A prevailing concept of therapeutic strategy to support restoration of function  
43 from such enduring debilitating conditions is to reactivate juvenile-like levels of heightened plasticity in  
44 the adult brain. One of the best-studied models of critical period plasticity is ocular dominance plasticity  
45 – the enduring loss of responsiveness in primary visual cortex (V1) to an eye deprived of vision <sup>3</sup> that  
46 results in amblyopia, a disorder of sight that affects 2–4% of the human population and has limited cure  
47 in adulthood. This model has long served to not only understand the fundamental regulatory  
48 mechanisms of critical periods, but also importantly to facilitate the discovery of novel targets to achieve  
49 reactivation of visual plasticity in adulthood.

50 Over the past decade, with the advent of gene targeting in mice <sup>4-7</sup>, the network of cortical  
51 inhibition was elucidated as one of the critical mechanisms for regulation of visual plasticity. The  
52 developmental initiation of the critical period can be accelerated or delayed by genetically or  
53 pharmacologically altering GABAergic inhibition in visual cortex <sup>8-16</sup>. Following critical period closure in  
54 the adult cortex, plasticity can be induced through pharmacological suppression of GABA<sub>A</sub> receptors <sup>17</sup>  
55 or through the transplantation of GABAergic precursors derived from the medial ganglionic eminence  
56 (MGE) <sup>18-20</sup>. To date, the role of GABAergic signaling in cortical plasticity has largely focused on  
57 parvalbumin (PV) interneurons <sup>15,18,21-23</sup>, where a number of known molecular mediators of plasticity  
58 appear to converge including orthodenticle homeobox protein 2 (otx2) <sup>15,24</sup> and perineuronal nets <sup>23</sup>. A  
59 recent report has shown that PV interneuron activity was reduced during the initial 24 hours following  
60 visual deprivation only during the juvenile critical period but not in adulthood. Mimicking this early  
61 reduction in firing using chemogenetic means in adult animals led to reactivation of plasticity,  
62 suggesting that PV interneuronal activity may be instructive for plasticity in visual cortex <sup>22</sup>. While their  
63 importance for plasticity in the visual cortex is undeniable, PV interneurons represent only one member

64 of a diverse group of cortical GABAergic interneurons<sup>25</sup>. The role of other subclasses of GABAergic  
65 interneurons, such as those expressing the peptide somatostatin (SST) that represent nearly a third of  
66 the cortical GABAergic interneurons, had largely been ignored until recently<sup>19,26</sup>. The molecular and  
67 circuit mechanisms underlying SST interneuron-mediated regulation of cortical plasticity remain  
68 completely unknown.

69 SST interneurons are promising targets for reactivating plasticity in the adult brain, as they are  
70 ideally situated to integrate multiple inputs including bottom-up sensory signals<sup>27</sup>, and neuromodulation  
71<sup>28</sup> induced by locomotion<sup>29-33</sup>, or by top-down regulation<sup>34-36</sup>. Moreover, SST interneurons highly  
72 innervate local PV interneurons, which places them in an ideal position to drive the rapid inhibition  
73 instructive to the juvenile form of plasticity. The neuromodulation of SST interneurons by nicotinic  
74 signaling that occurs in several brain regions<sup>28,37-39</sup>, may represent one potential means of restoring  
75 plasticity in the adult brain. Our previous study showed that an endogenous inhibitor of nicotinic  
76 Acetylcholine Receptors (nAChRs), Lynx1, is enriched in PV interneurons and actively limits V1  
77 plasticity following the critical period<sup>40</sup>. The Lynx family of proteins are GPI-anchored membrane  
78 proteins and have unique toxin-like protein structure, which enables them to bind to the extracellular  
79 face of nAChRs expressed in the same cells and regulate their signaling<sup>41</sup>. Our recent study further  
80 showed that another closely related member of the Lynx family, Lypd6, is enriched in SST interneurons  
81 in V1<sup>42</sup>. Interestingly, Lypd6 has been shown to potentiate calcium currents through nicotinic receptors  
82<sup>43</sup> in direct contrast to the action of Lynx1<sup>44</sup>. Here we sought to elucidate the potential for nicotinic  
83 modulation by Lypd6 in SST interneurons in the regulation of ocular dominance plasticity. This work  
84 provides the first molecular mechanism specifically associated with SST interneurons to reactivate  
85 plasticity in adult visual cortex.

86

## 87 **Results**

### 88 **Neuronal overexpression of Lypd6 prolongs ocular dominance plasticity into adulthood.**

89 First, to examine the expression profile of *Lypd6* in adult V1 where plasticity is limited versus  
90 that of juvenile critical period with heightened plasticity, we performed *in situ* hybridization to label  
91 *Lypd6* mRNA in V1 of mice at P28 (critical period) and >P60 (adult). We found that *Lypd6* expression is  
92 significantly lower in the adult compared to juvenile period which inversely correlates with the extent of  
93 ocular dominance plasticity (Fig. 1a, 1b: \* $P=0.02$ , Student's *t*-test). While *Lypd6* expression was even  
94 higher at P18 (pre-critical period) (p18: 244.91 +/-19.28 normalized to p60 data in Fig. 1a,  $p<0.05$  vs  
95 P28 or adult), interpretation of *Lypd6* contribution to nicotinic signaling during the pre-critical period is  
96 confounded by various additional developmental changes that could impact nicotinic signaling beyond  
97 *Lypd6* (e.g. nAChRs, cholinergic projections)<sup>45</sup>.

98 Based on this decline in *Lypd6* expression in adult V1, we tested if overexpression of *Lypd6* in  
99 adulthood could prolong ocular dominance plasticity beyond the critical period, utilizing a transgenic  
100 mouse line with pan neuronal overexpression of *Lypd6* (*Lypd6Tg*)<sup>43</sup>. Following a 4-day short-term  
101 monocular deprivation (4d MD) (Fig. 1c), ocular dominance plasticity was assessed in anesthetized  
102 mice using a 16-channel linear silicone probe<sup>46</sup>. Each recorded V1 cell was assigned an ocular  
103 dominance (OD) score based on the relative balance of strengths of visually evoked responses of the  
104 cell to the visual stimulus independently presented to the contralateral and ipsilateral eye. Adult (>P60)  
105 *Lypd6Tg* mice that underwent 4d MD show a significant shift in eye preference (OD shift) in V1, away  
106 from the deprived contralateral eye and towards the non-deprived ipsilateral eye, compared to non-  
107 deprived (no MD) adult *Lypd6Tg* mice or adult wild type (WT) mice that typically display no significant  
108 levels of plasticity regardless of visual deprivation (Fig. 1d: *Lypd6Tg* 4d MD vs. WT 4d MD:  
109 \*\*\*\* $P<0.0001$ , vs. *Lypd6Tg* no MD: \*\*\*\* $P<0.0001$ , *Lypd6Tg* no MD vs. WT no MD:  $P=0.28$ ,  $\chi^2$  test).  
110 Cumulative distributions of ocular dominance index (ODI: -1=most ipsilateral dominant,  
111 0=equal/binocular, 1=most contralateral dominant) for each recorded cell from each cohort show a  
112 significantly higher percentage of single neuronal responses that are relatively ipsilateral dominant in  
113 the *Lypd6Tg* 4d MD mice compared to control groups (Fig. 1e: vs. WT 4d MD: \*\*\*\* $P<0.0001$ , vs.

114 Lypd6Tg no MD:  $***P=0.0002$ , Lypd6Tg no MD vs. WT no MD:  $P=0.2332$ , Kolmogorov-Smirnov (K-S)  
115 test). Lastly, individual animal level comparisons of contralateral bias index (CBI) scores – the relative  
116 strength to which the visually evoked activity of V1 neurons from the contralateral eye dominates over  
117 that from the ipsilateral eye, show a significant decrease only in the Lypd6Tg 4d MD mice (Fig 1f:  
118  $****P<0.0001$ , one-way analysis of variance (ANOVA). Lypd6Tg 4d MD significantly differs from all  
119 other groups: WT no MD, WT4d MD, and Lypd6Tg no MD: respectively,  $****P<0.0001$ ,  $**P=0.0023$ , and  
120  $*P=0.0208$ ; Tukey's multiple comparisons test). Altogether the results suggest that Lypd6 is a novel  
121 positive regulator of ocular dominance plasticity.

122

### 123 **Lypd6 expression specifically in SST interneurons reactivates ocular dominance plasticity in** 124 **adult V1.**

125 While the prior experiments outline the sufficiency of neuronal overexpression of Lypd6 for  
126 prolonging ocular dominance plasticity into adulthood, the transgenic line does not provide temporal,  
127 spatial, or cell-type information regarding this modulation. In order to address these questions, we  
128 developed a Cre-dependent AAV vector for Lypd6 overexpression (AAV8-DIO-EGFP-2A-Lypd6: AAV-  
129 Lypd6) (Fig. 2a). Our previous study established that Lypd6 is most highly expressed in SST  
130 interneurons in V1 with lower expression in a subset of glutamatergic neurons<sup>42</sup>. Therefore, we  
131 characterized Lypd6 overexpression in V1 SST interneurons through viral injection of AAV-Lypd6 into  
132 adult SST-cre mice or in V1 glutamatergic neurons through dual viral injection of AAV-Lypd6 combined  
133 with an AAV with a cre expression vector driven by a CamKII promoter (AAV8-CamKIIa-mCherry-Cre:  
134 AAV-CamKII-cre) into adult WT mice similar to previous reports<sup>29,47</sup>. The viral injections were adjusted  
135 to target the deep cortical layers, comparable to the area where the endogenous expression of Lypd6  
136 has been previously reported to be localized<sup>42</sup>. In both conditions the GFP expression was restricted to  
137 SST or glutamatergic populations and provided robust overexpression of Lypd6 in V1 (Fig. 2b, c, d:  
138  $****P<0.0001$ , Student's *t*-test; and Supplementary Fig. 1).

139 Next, we assessed the ability of SST or glutamatergic overexpression of Lypd6 in V1 of adult  
140 animals to induce ocular dominance plasticity. We injected AAV-Lypd6 or control AAV vector (AAV8-  
141 hSyn-DIO-EGFP: AAV-GFP) into adult SST-cre mice and, after >3 weeks of viral incorporation,  
142 subjected them to 4d MD (Fig. 2e). In adult mice with SST-specific Lypd6 overexpression that  
143 underwent 4d MD (SST-Lypd6 4d MD), there was a significant OD shift compared to non-deprived (no  
144 MD) counterparts (SST-Lypd6 no MD) or control 4dMD mice with AAV-GFP injected (SST-GFP 4d MD)  
145 (Fig. 2f: SST-Lypd6 4d MD vs. CamKII-Lypd6 4d MD: \*\*\*\* $P < 0.0001$ , vs. SST-Lypd6 no MD:  
146 \*\*\*\* $P < 0.0001$ , vs. SST-GFP 4d MD: \*\*\* $P = 0.0006$ ,  $\chi^2$  test). To test whether glutamatergic  
147 overexpression of Lypd6 would also induce plasticity in adult mice, we injected a viral cocktail of AAV-  
148 CamKII-cre with either AAV-Lypd6 or AAV-GFP into V1 of adult WT mice and, after >3 weeks,  
149 subjected them to 4d MD (Fig. 2e). The viral cocktail approach resulted in 93.2% of cells successfully  
150 co-transfected (GFP-positive) with AAV-DIO-GFP-Lypd6 and AAV-CamKII-Cre as positive for the  
151 excitatory cell marker vGlut1 (Supplemental Fig 1c.), and 52.2% of total vGlut1-positive population as  
152 GFP-positive (Supplemental Fig. 1d). We did not observe significant shift in OD in mice with  
153 glutamatergic overexpression of Lypd6 that underwent 4d MD (CamKII-Lypd6 4d MD) or control  
154 counterparts (CamKII-Lypd6 no MD and CamKII-GFP 4dMD) (Fig. 2f: CamKII-Lypd6 4d MD vs.  
155 CamKII-GFP 4d MD:  $P = 0.67$ ,  $\chi^2$  test). The cumulative distributions of ODI also show only a significant  
156 shift in the SST-Lypd6 4d MD mice (Fig. 2g: SST-Lypd6 4d MD vs. CamKII-Lypd6 4d MD:  
157 \*\*\*\* $P < 0.0001$ , vs. SST-Lypd6 no MD: \*\*\* $P = 0.0001$ , vs. SST-GFP 4d MD: \*\*\* $P = 0.0002$ . CamKII-Lypd6  
158 4d MD vs. CamKII-GFP 4d MD:  $P = 0.49$ , K-S test). Lastly, comparisons of CBI scores show a significant  
159 decrease only in the SST-Lypd6 4d MD mice (Fig. 2h: \*\* $P = 0.0012$ , one-way ANOVA. SST-Lypd6 4d  
160 MD significantly differs from: SST-Lypd6 no MD, SST-GFP 4d MD, CamKII-Lypd6 4d MD: respectively,  
161 \*\* $P = 0.0477$ , \*\* $P = 0.0183$ , \*\* $P = 0.0073$ . CamKII-Lypd6 4d MD does not differ from CamKII-Lypd6 no MD  
162 or CamKII-GFP-4d MD: respectively,  $P = 0.9527$ , and  $P = 0.9969$ ; Tukey's multiple comparisons test). As  
163 a result, robust plasticity was measured only in the deprived mice that were overexpressing Lypd6  
164 specifically in SST interneurons. Taken together, these results suggest that SST interneurons are

165 critical for reactivation of plasticity in adult V1 via Lypd6. Furthermore, the temporal and spatial  
166 restriction of viral injections implies that overexpression of Lypd6 directly in V1 after the closure of  
167 critical period plasticity is sufficient for the induction of robust plasticity.

168

169  **$\alpha$ 2 nicotinic acetylcholine receptor subunit is required for reactivation of ocular dominance**  
170 **plasticity.**

171 We next aimed to determine the nAChR subtype mediating the effect of Lypd6 in SST  
172 interneurons on V1 plasticity. In the hippocampus, SST-positive oriens-lacunosum (O-LM) interneurons  
173 that share similar characteristics to some SST expressing cortical Martinotti interneurons<sup>48</sup>, express  
174 Lypd6 as well as  $\alpha$ 2-containing nAChR (nAChR $\alpha$ 2), which is the most sparsely expressed nAChR  
175 subtype in the brain and features unique non-desensitizing characteristics<sup>39,42</sup>. In the cortex, the  
176 punctate expression pattern of nAChR $\alpha$ 2 subunit in deep cortical layers<sup>49</sup> highly resembles that of  
177 Lypd6 expression<sup>42</sup>. Indeed, *in situ* hybridization of Lypd6 and nAChR $\alpha$ 2 revealed that 79% of cells  
178 labeled with nAChR $\alpha$ 2 also contain Lypd6, and that nAChR $\alpha$ 2 subunit is expressed on more than 53%  
179 of Lypd6 positive cells (Fig. 3a-c). Furthermore, while 23% of SST-positive cells overlapped with  
180 nAChR $\alpha$ 2 labeled cells, 95% of nAChR $\alpha$ 2 labeled cells overlapped with SST-positive cells (Fig. 3 d-f).  
181 No overlaps were observed between nAChR $\alpha$ 2 and VIP or vGlut1, the markers of vasoactive intestinal  
182 peptide interneuron and pyramidal cells (data not shown), consistent with a recent single cell RNA  
183 sequencing study in adult V1<sup>50</sup>. Together this confirms strong overlapping expression of Lypd6 and  
184 nAChR $\alpha$ 2, preferentially in a subpopulation of SST interneurons.

185 Due to this high degree of co-localization and known modulation of non- $\alpha$ 7 nAChRs by Lypd6<sup>43</sup>,  
186 we examined whether ablation of nAChR $\alpha$ 2 could eliminate the ocular dominance plasticity induced by  
187 adult SST-specific overexpression of Lypd6. To accomplish this, we created a bigenic SST-  
188 cre/Chrna2KO mouse line allowing for SST-specific Cre-recombinase expression on a background of  
189 nAChR $\alpha$ 2 knockout (Chrna2KO)<sup>51</sup>. We then injected AAV-Lypd6 into V1 of adult SST-cre/Chrna2KO



190 bigenic mice, allowed >3 weeks for viral incorporation, and assessed ocular dominance plasticity after  
191 4d MD (Fig. 3d). Intriguingly, ablating nAChR $\alpha$ 2 (SST-Ly $\alpha$ 6/ $\alpha$ 2KO 4d MD) eliminated the robust  
192 plasticity induced through SST-specific Ly $\alpha$ 6 overexpression in adult V1. Unlike the adult SST-Ly $\alpha$ 6  
193 4d MD mice, adult SST-Ly $\alpha$ 6/ $\alpha$ 2KO 4d MD mice, as well as deprived and non-deprived adult  
194 Chr $\alpha$ 2KO mice ( $\alpha$ 2KO 4d MD and  $\alpha$ 2KO no MD) did not show significant OD shifts (Fig. 3e: SST-  
195 Ly $\alpha$ 6/ $\alpha$ 2KO 4d MD vs. SST-Ly $\alpha$ 6 4d MD: \*\*\*\* $P$ <0.0001, vs.  $\alpha$ 2KO 4d MD:  $P$ =0.62.  $\alpha$ 2KO 4d MD vs.  
196  $\alpha$ 2KO no MD:  $P$ =0.24,  $\chi^2$  test), nor significant shifts of cumulative distributions of ODI (Fig. 3f: SST-  
197 Ly $\alpha$ 6/ $\alpha$ 2KO 4d MD vs. SST-Ly $\alpha$ 6 4d MD: \*\*\*\* $P$ <0.0001, vs.  $\alpha$ 2KO 4d MD:  $P$ =0.64.  $\alpha$ 2KO 4d MD vs.  
198  $\alpha$ 2KO no MD:  $P$ =0.06, K-S test), nor decreases in CBI (Fig. 3g: \*\* $P$ =0.0053, one-way ANOVA. SST-  
199 Ly $\alpha$ 6/ $\alpha$ 2KO 4d MD is only significantly different with SST-Ly $\alpha$ 6 4d MD: \* $P$ =0.0209, and is not  
200 different from  $\alpha$ 2KO 4d MD:  $P$ =0.9990.  $\alpha$ 2KO 4d MD vs.  $\alpha$ 2KO no MD:  $P$ >0.9999; Tukey's multiple  
201 comparisons test). These findings strongly suggest the requirement of nAChR $\alpha$ 2 in the induction of  
202 plasticity by Ly $\alpha$ 6 in SST interneurons.

203 To further investigate the physiological role of nAChR $\alpha$ 2 in regulating plasticity in adult V1, we  
204 turned to a condition known for modifying SST interneuron activity as well as reactivating V1 plasticity.  
205 Voluntary physical exercise through the use of a running wheel was recently shown to induce juvenile  
206 form of plasticity in adult mouse<sup>52</sup>. Interestingly, locomotion is also known to modulate SST interneuron  
207 activity<sup>29-33</sup>. We therefore examined the functional contribution of nAChR $\alpha$ 2 in this model of reactivation  
208 of V1 plasticity. When allowed voluntary exercise (+Running) on a running dish during the 4d MD (Fig.  
209 3h), adult WT mice (WT 4d MD, +Running) displayed a significant shift in ocular dominance, consistent  
210 with a published study<sup>52</sup>. However, adult Chr $\alpha$ 2KO mice that had undergone the same condition  
211 ( $\alpha$ 2KO 4d MD, +Running) displayed neither OD shift (Fig. 3i: Chr $\alpha$ 2KO 4d MD+Running vs. WT 4d  
212 MD+Running: \*\*\*\* $P$ <0.0001, vs. Chr $\alpha$ 2KO no MD+Running:  $P$ =0.35,  $\chi^2$  test), nor a shift in the  
213 cumulative distributions of ODI (Fig. 3j: Chr $\alpha$ 2KO 4d MD+Running vs. WT 4d MD+Running:  
214 \*\*\*\* $P$ <0.0001, vs. Chr $\alpha$ 2KO no MD+Running:  $P$ =0.33, K-S test), nor a significant decrease in CBI (Fig.

215 3k:  $**P=0.0030$ , one-way ANOVA. The only significant differences observed were between WT 4d  
216 MD+Running and all other groups: Chrna2KO 4d MD+Running and Chrna2KO no MD+Running:  
217 respectively,  $**P=0.0046$ ,  $**P=0.0103$ ; Tukey's multiple comparisons test). Interestingly, SST-specific  
218 viral knockdown of Lypd6 in the adult V1 of voluntary-exercise-induced plasticity model displayed  
219 similar level of OD plasticity as adult WT 4d MD+Running mice (n=106 cells from 4 mice.  $P=0.22$ ,  $\chi^2$   
220 test; Sadahiro et al., unpublished data). We postulated that other members of the Lynx family played a  
221 compensational role in mediating voluntary-exercise-induced plasticity in the Lypd6 knockdown context.  
222 Alternatively, as the role of Lypd6 is that of a positive modulator of nAChRs, and given that knocking  
223 out Chrna2 could eliminate the voluntary-exercise-induced plasticity, simply knocking down Lypd6 may  
224 not be sufficient to block exercise induced-plasticity in the presence of nAChR $\alpha$ 2. In addition, we  
225 performed qPCR on V1 extractions of adult WT 4d MD+Running mice (n=4) and control adult WT 4d  
226 MD (n=4) mice to examine if voluntary exercise changes the expression of Chrna2 or Lypd6, but did not  
227 find any significant expression level differences in either Chrna2 or Lypd6 (Chrna2:  $P=0.7908$ , Lypd6:  
228  $P=0.7111$  Student's *t*-test). We also compared Chrna2 expression between adult SST-Lypd6 no MD  
229 mice (n=2), and adult SST-GFP no MD mice (n=2), and did not detect any significant differences  
230 ( $P=0.20$ , Student's *t*-test). Perhaps increased cholinergic activity is sufficient to enhance nAChR $\alpha$ 2  
231 signaling and encourage voluntary-exercise-induced plasticity in the adult brain. Collectively, these  
232 results suggest that the voluntary-exercise-induced model of V1 plasticity requires nAChR $\alpha$ 2, further  
233 signifying the critical role of nicotinic signaling through nAChR $\alpha$ 2 in reactivating plasticity in adulthood.

234

235 **Lypd6 expressed in SST interneurons increases their activity to drive ocular dominance**  
236 **plasticity.**

237 Having ascertained that the effect of Lypd6 in reactivating V1 plasticity is regulated through SST  
238 interneurons, we investigated the plasticity mechanisms in these cells as well as downstream circuits.  
239 SST interneurons are known to provide inhibitory inputs onto PV interneurons in cortex<sup>28,53-57</sup>, and

240 inhibit PV interneurons twice as potently as pyramidal neurons in mouse V1<sup>58</sup>. As rapid reduction in PV  
241 interneuron firing, during the first day of MD, is a unique trigger of V1 plasticity during the critical period  
242 <sup>22</sup>, we examined whether adult overexpression of Lypd6 in SST interneurons can increase the activity of  
243 SST interneurons and in turn suppress PV activity during the first day of MD.

244 First, to directly evaluate how overexpression of Lypd6 in SST interneurons affects their activity,  
245 we used channelrhodopsin-2 (ChR2) as an optogenetic tag to identify any visually evoked single-unit  
246 responses as SST interneurons based on their time-locked optogenetic activation (Fig. 4a, b). We  
247 targeted expression of ChR2 specifically to SST interneurons by injecting AAV with Cre-dependent  
248 expression of ChR2 into adult SST-Cre mice along with either AAV-Lypd6 (SST-Lypd6) or AAV-GFP  
249 (SST-GFP) in adulthood (>P60) and, after >3 weeks of viral incorporation, subjected the mice to MD for  
250 a duration of 24 hours (1d MD) (Fig. 4c). Considering the physiological context of lypd6 expression in  
251 deep cortical layers, we restricted our analyses to only the SST interneurons recorded from the lower  
252 half of the 16-channel linear silicone probe in an effort to focus on the SST interneurons of lower layer  
253 IV, layers V, and VI. In adult SST-Lypd6 mice that underwent 1d MD (SST-Lypd6 1d MD), there was a  
254 significant increase in the visually evoked firing rate of SST interneurons compared to 1d MD adult  
255 SST-GFP mice (SST-GFP 1d MD) or non-deprived adult SST-Lypd6 (SST-Lypd6 no MD) mice when  
256 analyzed using a linear mixed model (LMM) that considers animal as a variable with random effect, and  
257 genetic manipulation (-GFP or -Lypd6) and experience (1d MD or no MD) as variables with fixed effects  
258 (Fig. 4d, e: SST-Lypd6 1d MD vs. SST-GFP 1d MD: \* $P=0.0136$ , vs. SST-Lypd6 no MD: \* $P=0.0339$ ,  
259 LMM: for details See *Methods – Statistical analysis*). In comparing baseline firing rates, only a trending  
260 increase in firing rate was observed in SST-Lypd6 1d MD mice (4.47 spikes/sec) relative to SST-GFP  
261 1d MD mice (2.87 spikes/sec) (SST-Lypd6 1d MD vs. SST-GFP 1d MD:  $P=0.057$ ), and no significant  
262 difference was found when assessing experience-dependent effects (SST-Lypd6 1d MD vs. SST-Lypd6  
263 no MD (4.77 spikes/sec):  $P=0.97$ , LMM). This result suggests an interactive effect of Lypd6  
264 overexpression and sensory experience in rapidly increasing SST interneuron activity.

265 To then determine the causal role of rapid increases in SST interneuron activity itself in  
266 mediating plasticity, we examined if chemogenetic activation of SST interneurons strictly during the first  
267 day of deprivation can reactivate plasticity (Fig. 4f and Supplementary Fig. 3). Adult SST-cre mice were  
268 injected with an AAV with Cre-dependent expression of excitatory Gq protein-Designer Receptors  
269 Exclusively Activated by Designer Drugs (AAV8-hSyn-DIO-hM3D(Gq)-mCherry: AAV-GqDREADD)<sup>59</sup>. In  
270 mice injected with Clozapine-N-Oxide (CNO) to activate SST interneurons during the first day of the 4d  
271 MD (CNO+), there was a significant OD shift compared with mice that received saline injections (CNO-)  
272 (Fig. 4g: \*\*\* $P=0.0007$ ,  $\chi^2$  test). The cumulative distributions of ODI show a significant shift in CNO+  
273 mice compared to CNO- mice (Fig 4h: \*\* $P<0.0001$ , K-S test). Comparisons of CBI scores show a  
274 significant decrease only when SST interneurons were activated by injection of CNO (Fig. 4i:  
275 \* $P=0.0208$ , Student's  $t$ -test). Together, these results imply a novel role for SST interneuron activity in  
276 reactivating a juvenile form of plasticity in adult V1.

277

278 **Lypd6 expressed in SST interneurons suppresses PV interneuron activity to drive ocular**  
279 **dominance plasticity.**

280 Finally, we aimed to elucidate the consequence of Lypd6-mediated elevation in SST activity,  
281 specifically upon PV interneuron activity. In adult SST-cre mice, we injected AAV-Lypd6 (SST-Lypd6) or  
282 AAV-GFP (SST-GFP) and, after >3 weeks of viral incorporation, subjected the mice to 1d MD (Fig. 5a).  
283 We putatively determined the cell-type identity of visually evoked PV interneurons using spike shape-  
284 based classification. Visually evoked cells were sorted into two categories: putative fast-spiking PV-  
285 (pFS) neurons, as defined by a characteristic narrow spike waveform, or regular-spiking neurons (RS)  
286 (Supplementary Fig. 2d, e).

287 In adult SST-Lypd6 mice that underwent 1d MD (SST-Lypd6 1d MD), use of standard binomial  
288 tests to compare cell-level means of pFS neuron firing rates confirmed a significant reduction compared  
289 to all control groups (Fig. 5c see legend). However, analysis using LMM showed a trending reduction

290 with no statistical significance (Fig. 5b, c: SST-Lypd6 1d MD vs. SST-GFP 1d MD:  $P=0.211$ , vs. SST-  
291 Lypd6 no MD:  $P=0.2301$ , vs. SST-GFP no MD:  $P=0.1161$ , LMM), likely reflecting a broad distribution of  
292 firing rates among pFS neurons. We therefore further subdivided the firing rates of the pFS neurons  
293 from each group into 6 categorical bins of 6 spikes/second each, ranging from 0 to 36 spikes/second,  
294 and found the distribution of the firing rates of pFS neurons of adult SST-Lypd6 1d MD mice to be  
295 significantly different from all controls, such that these mice had a higher amount of cells distributed  
296 towards the lowest firing rate category compared to all other groups (Fig. 5d: SST-Lypd6 1d MD vs.  
297 SST-GFP 1d MD:  $***P=0.0009$ , vs. SST-Lypd6 no MD:  $*P=0.00454$ , vs. SST-GFP no MD:  $*P=0.0160$ ,  $\chi^2$   
298 test). This suggests that 1d MD results in a decrease in visually evoked firing rate of pFS cells only  
299 when Lypd6 is overexpressed in adult SST interneurons. When strictly comparing the fraction of the  
300 lowest firing rate category to that of the second lowest firing rate category within each group, only the  
301 adult SST-Lypd6 1d MD mice had a significantly larger fraction of pFS cells in the lowest firing rate  
302 category compared to that of the second lowest firing rate category (Fig. 5e:  $*P=0.0136$ , Student's  $t$ -  
303 test). With respect to baseline firing rates, no significant differences were observed (SST-Lypd6 1d MD  
304 (2.06 spikes/sec) vs. SST-GFP 1d MD (2.55 spikes/sec):  $P=0.86$ , vs. SST-Lypd6 no MD (3.08  
305 spikes/sec):  $P=0.49$ ). Altogether these results may suggest an interactive effect of overexpression of  
306 Lypd6 and sensory experience in rapidly decreasing PV interneuron activity.

307 To determine the causal role of PV interneuron activity in robust plasticity regulated by Lypd6,  
308 we examined if chemogenetic restoration of PV interneuron activity during the first day of deprivation  
309 can prevent robust plasticity regulated by Lypd6 overexpression (Fig. 5d and Supplementary Fig. 4).  
310 Adult bigenic Lypd6Tg/PV-cre mice were injected with AAV-GqDREADD. In mice injected with CNO to  
311 activate PV interneurons during the first day of the 4d MD (CNO+), there was a significant blockage of  
312 ocular dominance plasticity compared with mice that received saline injections (CNO-) (Fig. 5g:  
313  $**P=0.0030$ ,  $\chi^2$  test). The cumulative distributions of ODI show that the shift is significantly eliminated in  
314 CNO+ mice compared to CNO- mice (Fig. 5h:  $**P=0.0054$ , K-S test). Comparisons of CBI scores show

315 a blockage of decrease only when PV interneurons were activated by injection of CNO (Fig. 5i:  
316 \* $P=0.0128$ , Student's  $t$ -test). While we cannot fully rule out the possibility that the suppression of V1  
317 responses by the chemogenetic activation of PV interneurons partly contributed the blockage of  
318 plasticity, together these results implicate the role of *Lypd6* in potentiating SST activity to engage an  
319 SST interneuron-based inhibition of PV interneurons, a novel inhibitory-inhibitory circuit, to induce a  
320 juvenile form of plasticity in the adult V1.

321

## 322 **Discussion**

323 Our study identified an endogenous nAChR modulator, *Lypd6*, and its action through nAChR $\alpha$ 2 as  
324 the first SST interneuron-specific molecular targets to reactivate plasticity in the adult cortex. As SST  
325 interneurons are known to be modulated by alteration of visual inputs<sup>27</sup>, neuromodulation induced by  
326 locomotion<sup>29-33</sup>, or top-down regulation<sup>34-36</sup>, the *Lypd6*-nAChR $\alpha$ 2 system is ideally situated to gate  
327 these multiple modulatory inputs onto SST interneurons to regulate plasticity. Having demonstrated the  
328 *Lypd6*-nAChR $\alpha$ 2 system as a molecular target for restoring plasticity in the adult brain, it would be  
329 necessary in future studies to determine to what extent they are relevant in regulating plasticity in the  
330 juvenile cortex. Our study provides critical knowledge underlying the molecular and circuit means for  
331 the induction of plasticity in the adult visual cortex, which can unveil potential targets to help establish  
332 new therapeutic targets and strategies for the treatment of disorders with limited recovery potential due  
333 to diminished plasticity such as amblyopia.

334

## 335 ***Lypd6* as a novel plasticity regulator through nAChR $\alpha$ 2**

336 *Lypd6*, like several members of the Lynx family<sup>41</sup>, is membrane tethered through a  
337 glycosylphosphatidylinositol (GPI)-anchor and is known to modulate nicotinic signaling<sup>43</sup>. Our results from  
338 SST-specific *Lypd6* overexpression on a background of *Chrn* $\alpha$ 2 knockout suggest that the primary

339 mechanism for Lypd6-based initiation of plasticity is specifically mediated through nAChR $\alpha$ 2s. However,  
340 Lypd6 may also have additional activity unrelated to nicotinic signaling<sup>60</sup>. While the subcellular  
341 localization of Lynx proteins has not been fully elucidated, there is evidence that they potentially  
342 localize to synaptic compartments to modulate nAChRs<sup>61 62</sup>. Lypd6 may facilitate the activation of SST  
343 interneurons by impacting postsynaptic nicotinic modulation of excitatory synaptic input onto SST  
344 interneurons, such as in the case of hippocampus CA1 oriens-lacunosum where nAChR $\alpha$ 2 and their  
345 non-desensitizing features are critical for gating LTP through receptor-mediated calcium influx in SST  
346 interneurons<sup>39</sup>. Alternatively, Lypd6 may modulate nicotinic signaling at presynaptic SST terminals to  
347 facilitate the release of GABA<sup>63</sup>. Nevertheless, either potential mechanism may achieve the facilitation  
348 of activity of SST interneurons, a physiological condition that we confirmed, through chemogenetic  
349 activation of SST-interneurons, to be a trigger of robust plasticity (Fig. 4). While proper antibodies  
350 suited for immunohistochemical analyses are currently unavailable, application of recently developed  
351 technologies such as *in vivo* genome editing<sup>64</sup> that would allow labeling of endogenous Lypd6 or  
352 nAChR $\alpha$ 2 protein will reveal more mechanistic insight in future studies.

353

#### 354 **Deep layer cortical SST interneuron as a cellular target for nicotinic modulation of plasticity**

355 Our study highlights Lypd6-nAChR $\alpha$ 2 expressing SST interneurons located in deep layers of V1 as  
356 a key cellular target for nicotinic neuromodulation to reactivate plasticity in adulthood. Previous studies  
357 have reported mixed results regarding the question of whether nicotinic signaling directly affects SST  
358 interneurons. While some studies reported clear nicotinic responses in neocortical SST interneurons<sup>65</sup>  
359<sup>66 28</sup>, some have reported otherwise<sup>67 68</sup>. The discrepancy may reflect the observation that expression  
360 of Lypd6 and nAChR $\alpha$ 2 is selective to a subpopulation of SST interneurons located in deep cortical  
361 layers (layers 5 and 6) but not to those in layer 2/3 (Fig.3)<sup>50 42</sup>. It is possible that such a minor  
362 subpopulation of deep layer Lypd6-expressing SST interneurons was just not well represented in the  
363 previous negative reports. For example Gullledge et al.<sup>66</sup> reported that 30% of SST interneurons in layer

364 5 rat V1 responded to nicotine, which is consistent with the percentage of SST cells expressing Lypd6  
365 and nAChR $\alpha$ 2. While the expression of Lypd6 and nAChR $\alpha$ 2 are limited to a subpopulation of deep  
366 layer cortical SST interneurons, the unique non-desensitizing nature of nAChR $\alpha$ 2 allows continual  
367 activation and calcium entry in the presence of Ach<sup>39</sup>, making the nAChR $\alpha$ 2 highly suited for driving  
368 cortical plasticity by elevating nicotinic tone with Lypd6 or by triggering cholinergic inputs through  
369 locomotion. The SST-interneurons in deep cortical layers are also reported to project widely to almost  
370 all cortical layers and types of neurons<sup>69</sup>, which can potentially contribute to widespread distribution of  
371 the drive for cortical plasticity exerted through nAChR $\alpha$ 2. Overall our study highlights the Lypd6-  
372 nAChR $\alpha$ 2 expressing SST interneuron as a cellular target of nicotinic neuromodulation to reactivate  
373 cortical plasticity in the adult V1. More mechanistic insight into the physiological action of ACh and  
374 Lypd6 on nAChR $\alpha$ 2 signaling in this selective population of SST interneurons can be expected in future  
375 studies by taking full advantage of the recently developed cre mouse lines targeting specific  
376 subpopulations of SST interneurons<sup>38 70</sup> and combining with future development of a new ChAT-ChR2  
377 transgenic mouse line that avoids confounding abnormally high cholinergic tone<sup>71</sup>, to allow proper  
378 optogenetic modulation of endogenous Ach release. The development of the selective nAChR $\alpha$ 2  
379 antagonists for acute pharmacological modulation is also highly anticipated.

380

### 381 **SST-PV disinhibition as a novel circuit for restoring juvenile form of plasticity in the adult**

382 Our findings establish a novel circuit mechanism for triggering a juvenile form of plasticity in  
383 adulthood – through SST interneuron-mediated inhibition of PV interneurons. To our knowledge, this is  
384 the first evidence implicating the role of the SST-PV disinhibitory circuit in modulating cortical plasticity.  
385 We demonstrated that the overexpression of Lypd6 in SST interneurons leads to reduced PV  
386 interneuron activity, similar to what is typically observed only in juvenile mice after 1 day of visual  
387 deprivation<sup>22</sup>. Interestingly, a recent study showed that *silencing* of SST interneurons for the *entirety of*  
388 *5 days of visual deprivation* can enhance some level of cortical plasticity in adulthood, but the nature of



389 plasticity measured was restricted as an adult form – an elevation of open ipsilateral eye response but  
390 no reduction of the deprived contralateral eye response, which is typically a hallmark of plasticity in  
391 juvenile mice <sup>26</sup>. Nevertheless, collectively these studies highlight the capabilities of SST interneurons  
392 in engaging both a homeostatic adult form of plasticity <sup>26</sup> and a rapid form of juvenile like-plasticity <sup>22</sup>,  
393 depending on the level of SST interneuron activity (reduced or activated) and the timing of activity  
394 change (during the initial phase of plasticity within 1 day or later homeostatic phase after 5 days) – a  
395 versatility reflected by the placement of the SST interneuron in the cortical circuit as an integrator of a  
396 variety of inputs. Consistently, recent studies demonstrated that SST interneurons in V1 can either be  
397 activated or suppressed by neuromodulatory inputs triggered by locomotion depending on the context  
398 of the visual environment <sup>29-33</sup>. Specifically, locomotion enhances overall SST interneuron activity when  
399 the mouse is presented with large visual input <sup>29,30</sup> including a full-field gray screen <sup>31</sup>. On the other hand,  
400 SST interneurons are largely non-responsive to small visual inputs <sup>30</sup> or suppressed in darkness by the  
401 neuromodulatory activation of the VIP-SST circuit <sup>29 32</sup>. We propose a model whereby the Lypd6-  
402 nAChR $\alpha$ 2 system may function as a molecular switch board for SST interneurons to shift modes and  
403 activate the nAChR $\alpha$ 2-dependent SST-PV disinhibitory circuit, <sup>38,72</sup> to trigger a juvenile form of plasticity  
404 <sup>22</sup> while suppressing an adult form of plasticity, mainly through reduction of inhibitory action upon the  
405 distal dendrites of pyramidal neurons <sup>26,73,74</sup> that is normally engaged through an nAChR $\alpha$ 2-independent  
406 vasoactive intestinal peptide VIP-SST disinhibitory circuit <sup>26</sup>. In this model, both SST-PV and VIP-SST  
407 disinhibitory circuits can co-exist to play complementary roles in the modulation of plasticity, depending  
408 on the context and states of the adult brain. While SST interneurons are known to exhibit maturation  
409 towards the end of the critical period in V1<sup>75</sup>, the differential contributions of SST-PV and VIP-SST  
410 circuits in regulating plasticity between critical period and adulthood remains unknown. It also remains  
411 to be determined how neuromodulation of SST interneurons changes from critical period to adulthood  
412 to regulate plasticity.

413

414 **Lypd6-nAChR $\alpha$ 2 system as a potential therapeutic target for modulating plasticity in brain**  
415 **disorders**

416 The potential for signaling through nAChR $\alpha$ 2 and its modulation by Lypd6 to induce plasticity in  
417 the adult cortex opens up the possibility of targeting these receptors for therapeutic interventions. The  
418 selective expression of Lypd6 and nAChR $\alpha$ 2 in SST interneurons make them attractive novel  
419 therapeutic targets with the potential of fewer off target effects <sup>76-78</sup> than interventions directed against  
420 more non-specific targets (more abundant nicotinic subunits) to treat conditions where recovery is  
421 limited due to diminished plasticity such as amblyopia, stroke, and traumatic brain injury. There are  
422 recent reports of positive allosteric modulators with much higher specificity for nAChR $\alpha$ 2 <sup>76-78</sup>.  
423 Combinations of such pharmacological interventions with behavioral interventions like physical exercise  
424 <sup>52</sup> known to impact SST interneuron activity <sup>29-32,79</sup> (Fig. 3) may also become fruitful aims. Finally, our  
425 study highlights the disruption of cortical plasticity as a key pathophysiological consequence of either  
426 mutations of the *nAChR $\alpha$ 2* gene <sup>80 81 82</sup> and its non-coding regulatory elements <sup>83</sup>, or deficits in SST  
427 interneurons<sup>84 85 86 87 88 89 90</sup> increasingly reported in multiple neurodevelopmental, neurodegenerative,  
428 and psychiatric disorders including epilepsy, addiction, depression, and schizophrenia.

429

430

431

432

433

434

435

436

437 **Methods**

438 **Animals.**

439 All mice were housed in groups of 2–5 together with the sibling groups of the same sex in  
440 standard and uniform cage sizes (199 mm x 391 mm x 160 mm: width x depth x height, GM500,  
441 Tecniplast) under a 12hr light:dark cycle (lights on at 7:00AM: lights off at 7:00PM) in a facility with  
442 constant temperature (23°C) and ad libitum access to food and water. Wild-type C57Bl/6 mice were  
443 obtained from Jackson laboratory and Charles River. Both male and female were used. Lypd6Tg mice  
444 were originally generated by A.Z.<sup>43</sup>, and transferred to H.M. and back-crossed to C57Bl/6.  
445 Somatostatin-ires-cre (SST-cre: Jackson laboratory #013044), Parvalbumin-ires-cre (PV-cre: Jackson  
446 laboratory #008069), and Chrn $\alpha$ 2KO (MMRRC #30508) were purchased and bred in-house. Bigenic  
447 lines were created through targeting breeding of above strains. All animal protocols were approved by  
448 the Institutional Care and Use Committee (IACUC) at Icahn School of Medicine at Mount Sinai.

449

450 **Monocular deprivation.**

451 Adult mice (>P60) were anesthetized with isoflurane. Eyelid margins were trimmed using an iris  
452 scissor and one eye was sutured closed for one or four days. Following MD, mice were returned to their  
453 home cage prior to extracellular recording and subsequent euthanasia.

454

455 **Generation and validation of AAV-Lypd6.**

456 *Lypd6* was amplified from a cDNA library derived from whole mouse V1, subcloned into a  
457 pcDNA3.1(-) vector using an isothermal DNA assembly method (Gibson Assembly; New England  
458 Biolabs) and transformed into *E. Coli*. Colonies with correct insert were identified through DNA  
459 sequencing (Genewiz), cultured and then isolated using a Hi-speed Midiprep kit (Qiagen). Expression  
460 was first examined by transfection of N2A cells *in vitro*. To create pAAV vector, an inverted bicistronic

461 2A sequence was inserted into pAAV-Ef1a-DIO-EGFP-WPRE-pA (Addgene#37084) upstream of EGFP  
462 by PCR linearization and overhang production on pAAV vector. The pcDNA3.1(-)-Lypd6 vector was  
463 used as a template for the Lypd6 insert which was subsequently inserted into the pAAV-DIO-EGFP-2A  
464 vector as described above to create a pAAV-DIO-EGFP-2A-Lypd6-WPRE-pA vector. After sequence  
465 verification, a large culture and Maxiprep isolation produced a purified vector that was sent to the UNC  
466 viral core for viral packaging using an AAV8 serotype. To confirm viral efficiency, AAV-Lypd6 was  
467 stereotaxically injected (see below for injection methods) into V1 of SST-cre mice. After perfusion,  
468 sections were labeled with rabbit anti-somatostatin antibodies (1:1000; Peninsula Laboratories) and the  
469 SST-specific GFP expression was confirmed. V1 was micro-dissected from an additional cohort of mice  
470 to assay overexpression of Lypd6 through qPCR. RNA was isolated using an RNeasy lipid tissue mini  
471 kit (Qiagen) and cDNA was produced. The cDNA was subjected to qPCR analysis using a Taqman  
472 assay (Life Technologies) at the Icahn School of Medicine at Mount Sinai Quantitative PCR CORE  
473 facility.

474

#### 475 **Stereotaxic injection.**

476 Mice were isoflurane anesthetized and head-fixed in a mouse stereotaxic apparatus (Narishige).  
477 A mid-line incision was made in the scalp and a micro-drill was used to drill a small hole in the skull  
478 over the right visual cortex. Three injections (0.5  $\mu$ l each) were made into the deep layers of V1  
479 binocular zone (from lambda: AP: 0.0, ML: 3.1, DV: 0.6; AP: 0.0, ML: 2.85, DV: 0.6; AP: 0.3, ML: 3.0,  
480 DV: 0.6) using a 2.5  $\mu$ l syringe (Hamilton Company) with a 30-gauge needle and microsyringe pump  
481 controller (World Precision Instruments) set to inject at 200nl/minute. The syringe remained in place for  
482 one minute following injection to reduce backflow of virus. After injections, the skull hole was sealed  
483 using Kwik-Sil (World Precision Instruments), and the scalp was sutured. The mice were allowed to  
484 recover from anesthesia in an empty cage over a warming pad. Following recovery, mice were returned  
485 to their home cage where they remained for >3 weeks to allow for viral incorporation prior to any

486 additional procedures or testing. The following viral constructs were used in this study: AAV-Lypd6  
487 (AAV8-EF1 $\alpha$ -DIO-EGFP-2A-Lypd6), AAV-GFP (AAV8-hSyn-DIO-EGFP) (University of North Carolina  
488 (UNC) vector core), AAV-CamKII-Cre (AAV8-CamKIIa-mCherry-Cre: UNC vector core), AAV-  
489 GqDREADD (AAV8-hSyn-DIO-hM3D(Gq)-mCherry: UNC vector core), and AAV-ChR2 (AAV2-Ef1a-  
490 DIO-hChR2(H134R)-mCherry-WPRE-pA: UNC vector core).

491

492 **Chemogenetic activation of hM3d(Gq) Designer Receptors Exclusively Activated by Designer**  
493 **Drugs (DREADD).**

494 Clozapine-N-Oxide (CNO; Sigma-Aldrich), a normally inert compound that specifically activates  
495 DREADD receptors, was prepared in 0.9% saline and injected i.p. into adult SST-Cre (Fig. 4f-i) or  
496 Lypd6Tg/PV-cre bigenic mice (Fig. 5d-g) at a concentration of 3 mg/kg. CNO or saline was injected  
497 immediately following MD and again 12 hours later for DREADD induced activation of SST or PV  
498 interneurons during the first day of MD following the previously validated protocol in mouse visual  
499 cortex<sup>22</sup>(Supplementary Fig. 3, 4).

500

501 **In vivo extracellular recording.**

502 Recording was performed under nembutal/ chlorprothixene anesthesia as previously  
503 described<sup>46</sup>. For animals that had been monocularly deprived, under anesthesia the deprived  
504 contralateral eye was reopened just prior to the start of recordings. Visually evoked single-unit  
505 responses were recorded in response to a high contrast single bar, generated by Visage System  
506 (Cambridge Research Systems), that laterally traveled across the monitor in a 4 second interval  
507 followed by a 5 second interstimulus interval per trial. The stimulus was separately presented, by the  
508 use of an eye patch, first to the deprived eye and then to the open eye for 12 trials each. For each  
509 animal, 3 to 10 single units were recorded in each of the 4 to 6 vertical penetrations spaced evenly (250

510  $\mu\text{m}$  intervals) across mediolateral extent of V1 to map the monocular and binocular zones to avoid  
511 sampling bias. A linear 16-channel electrode was used to record vertical penetrations, which allowed to  
512 record with similar weight from upper (channels 1~8) and lower (channels 1~9) cortical layers. By  
513 analyzing 7 of the experimental groups that were used in our data, we found that the fraction of neurons  
514 recorded from Upper Layers= $0.5235 \pm 0.02350$  and Lower Layers= $0.4765 \pm 0.02350$  ( $n=35$  animals:  
515  $P=0.3247$ , Student's t-test for paired samples). The signal was amplified and thresholded (OmniPlex,  
516 Plexon). To ensure single-unit isolation, the waveforms of recorded units were further examined offline  
517 (Offline Sorter, Plexon). To analyze the electrophysiology data, normalized OD index of single neuron  
518 was computed by custom made MATLAB program by peristimulus time histogram analysis of peak to  
519 baseline spiking activity in response to each eye:  $\{[\text{Peak}(\text{ipsi})-\text{baseline}(\text{ipsi})]-[\text{Peak}(\text{contra})-\text{baseline}(\text{contra})]\}/\{[\text{Peak}(\text{ipsi})-\text{baseline}(\text{ipsi})]+[\text{Peak}(\text{contra})-\text{baseline}(\text{contra})]\}$ . OD scores were  
520 converted from OD index using a 7-point classification scheme as follows: -1 to -0.5 = 1, -0.5 to -0.3 = 2,  
521 -0.3 to -0.1 = 3, -0.1 to 0.1 = 4, 0.1 to 0.3 = 5, 0.3 to 0.5 = 6, 0.5 to 1 = 7. For each binocular zone,  
522 contralateral bias index (CBI) is calculated according to the formula:  $[(n1-n7)+2/3(n2-n6)+1/3(n3-$   
523  $n5)+N]/2N$ , where  $N$ =total number of cells and  $n_x$ =# of cells corresponding to OD score of  $x$ .

525 For optical tagging experiments, SST interneurons were optogenetically tagged by injecting a  
526 Cre-dependent virus expressing channelrhodopsin-2 (AAV2-Ef1a-DIO-hChR2(H134R)-mCherry-  
527 WPRE-pA: UNC Vector Core) into the V1 binocular zone of SST-cre mice. The expression of  
528 channelrhodopsin in a cell-type of interest allowed the use of optogenetic stimulation with a blue light as  
529 a search stimulus to simultaneously sort stimulus-locked responses from cell-types of interest, and then  
530 record their visually evoked responses, by using an optic fiber-coupled 16-channel linear silicone probe  
531 (Neuronexus). This allowed accurate and high-throughput recordings of specific cell-types, even  
532 against broad baseline noise and activities of other neuronal populations. Optogenetically tagged SST  
533 interneurons of the V1 binocular zone were identified using a 473 nm (blue) laser search stimulus  
534 emitted and delivered through the optic fiber coupled to the silicone probe and oriented immediately

535 above the V1 cortical surface. After sorting for optogenetically responsive units (SST interneurons  
536 expressing ChR2), the optogenetic stimulus was switched off. Then a high-contrast single bar visual  
537 stimulus was presented to each eye to record the visual evoked responses (spike firing rate) of the  
538 sorted units. To analyze the SST interneuron visually evoked firing rates, normalized firing rate was  
539 computed by first using a custom made MATLAB program to generate a peristimulus time histogram-  
540 based analysis of peak and baseline spiking activity in response to visual stimulus. The peak activity  
541 was then subtracted by baseline spiking activity in order to obtain the normalized visually evoked firing  
542 rate. The normalized firing rates of SST interneurons from each experimental condition were then  
543 pooled and averaged, and finally compared between groups.

544 To isolate visually evoked responses from putative fast-spiking (pFS) neurons, visual stimulus  
545 responsive cells were distinguished as pFS neurons or regular-spiking (RS) neurons by means of spike  
546 width- (trough-to-peak time) based classification. The spike-width criterion for separating into pFS and  
547 RS neurons was established by measuring the spike width of optogenetically tagged PV interneurons.  
548 PV interneurons were optogenetically tagged by injecting a Cre-dependent virus expressing  
549 channelrhodopsin-2 (AAV2-Ef1a-DIO-hChR2(H134R)-mCherry-WPRE-pA, UNC Vector Core) into V1  
550 binocular zone of PV-cre mice. During recording, PV interneurons were first identified and sorted, using  
551 a 473 nm laser search stimulus delivered through the optical fiber coupled to the 16-channel silicone  
552 probe and oriented immediately above the V1 cortical surface, depending on their responsiveness to  
553 blue light stimulation within 3 msec post blue light emission. The search stimulus was then exchanged  
554 to a visual stimulus. Visually evoked spike widths of the PV interneurons identified by optical tagging  
555 were then pooled to establish the official criterion for pFS neurons as having visually evoked spike  
556 width time (trough-to-peak time) of less than 412  $\mu$ sec (Supplementary Fig. 2). Averaged spike  
557 waveform data for each unit was analyzed using a custom made MATLAB program to obtain a spike  
558 width time for each unit.

559 All AAV injected mice were transcardially perfused following recording and the extent of GFP or  
560 mCherry signal was utilized to assess the viral transduction. Only mice that exhibited GFP or mCherry  
561 signal in the recorded V1 area were included for the analysis of ocular dominance plasticity.

562

### 563 **In situ hybridization.**

564 The production of probes and methodology for *in situ* hybridization has been previously  
565 described<sup>42</sup>. Briefly, RNA probes including a fluorescein or digoxinogen (DIG) tag were generated and  
566 utilized to label *Lypd6*, *SST*, *VIP*, *vGlut1*, *GFP*, and *nAChR $\alpha$ 2* mRNA in 7  $\mu$ m sections of V1 from fresh  
567 frozen brains of animals at P28 (CP) and >P60 (adult). To fluorescently label mRNA, anti-  
568 fluorescein/DIG-POD (1:2000; Roche) and anti-fluorescein/DIG-Alkaline phosphatase (AP) (1:1000;  
569 Roche) antibodies were used. POD-conjugated antibody labeling of mRNA was proceeded with with  
570 TSA Plus DNP signal amplification (Perkin Elmer) and a subsequently labeling with anti-DNP-KLH-488  
571 antibodies (1:1000; Life Technologies). AP-conjugated-antibody-labeled mRNA was stained using  
572 HNPP/Fast Red (Roche). Imaging was performed using an LSM780 confocal microscope (Zeiss).  
573 ImageJ was used to quantify the density of labeled pixels from each image or to examine co-  
574 localization using a color based thresholding method. For the quantification of *Lypd6* mRNA expression  
575 across age in V1, pixel density (>2 standard deviations above mean intensity of full image field) was  
576 determined from low magnification images of V1 binocular zone using ImageJ software. For the  
577 quantification of co-localization of *Lypd6* or *SST* or *VIP* with *nAChR $\alpha$ 2*, the number of cells positive for  
578 *Lypd6/SST/VIP* or *nAChR $\alpha$ 2* in each image was determined using ImageJ by automated counting using  
579 a threshold of >2 standard deviations above background and limiting to particles of >40  $\mu$ m cell  
580 diameter. To calculate the co-localization percentage, first color based thresholding was utilized in  
581 ImageJ to isolate and quantify the co-localized cells, then percentage was calculated by dividing the  
582 number of co-localized cells by the number of *Lypd6/SST/VIP* or *nAChR $\alpha$ 2* positive cells in each image.  
583 For the quantification of co-localization of *GFP* and *vGlut1* mRNA, thresholding was first utilized to



584 isolate and calculate number of particles representing *GFP* labeled cells (>40  $\mu\text{m}$  cell diameter). Then  
585 the corresponding *vGlut1* labeled image was redirected to the mask retained from the analysis of *GFP*  
586 labeled image to calculate total number and then percentage of *GFP* labeled cells with co-localized  
587 *vGlut1* labeling. For the quantification of *Lypd6* mRNA expression in V1 binocular zone of mice injected  
588 with a cocktail of AAV-DIO-Lypd6 and AAV-CamKII-Cre, low magnification images of binocular V1 from  
589 the injected or the corresponding naïve hemisphere were analyzed for particles after thresholding.  
590 Absolute intensity for each particle was then measured as the product of mean intensity and area of  
591 particle. All absolute intensity values were summed to obtain total binocular V1 intensity, which was  
592 subsequently normalized by dividing by the  $\mu\text{m}^2$  area of the V1 binocular zone. The V1 binocular zone  
593 of each image was assessed using Paxinos and Franklin's The Mouse Brain in Stereotaxic Coordinates  
594 (1997) as reference.

595

## 596 **Quantitative PCR (qPCR)**

597 Adult mice were deeply anesthetized with isoflurane, checked for response with paw pinch, and  
598 decapitated. The brain was extracted, and under RNase- free conditions, briefly washed in ice cold 0.1  
599 M phosphate buffer, and then an estimated area of cortical tissue representing V1 – a 2mm-by-2mm  
600 area of the cortex most posterior and 2mm lateral from the median, was cut out, white matter removed,  
601 immediately frozen on dry ice, and stored under  $-80^{\circ}\text{C}$ . Total RNA was extracted from V1 using the  
602 RNeasy Mini Kit (Qiagen) and stored at  $-80^{\circ}\text{C}$ . concentrations of total V1 RNA yielded ranged from 0.22  
603 to 0.3  $\mu\text{g}/\mu\text{l}$ . Total V1 RNA was converted to cDNA using a High- Capacity cDNA Reverse Transcription  
604 Kit (Life Technologies). qPCR was performed at the Mount Sinai Quantitative PCR core facility using  
605 7900HT Real-Time PCR instrument (ABI/Life Technologies), TaqMan probes (catalog numbers: *Lypd6*  
606 *Mm00622636\_01*, *Chrna2 Mm00460630\_m1*, ABI/Life Technologies) and TaqMan Universal Master  
607 Mix II, no UNG (ABI/Life Technologies). Quantification of the fold change was calculated via the  $-\Delta\Delta\text{CT}$

608 method (equivalent to a log<sub>2</sub> fold change), using  $\Delta$ CT values derived by normalization of CT values to  
609 mouse beta actin as reference housekeeping gene.

610

## 611 **Immunohistochemistry**

612 Anesthetized mice were transcardially perfused with cold 4% paraformaldehyde (PFA) dissolved  
613 in 0.1M phosphate buffer. The brains were post-fixed in 4% PFA at 4 °C, and cryoprotected in 30%  
614 sucrose solution. The frozen brains were sectioned into 30- $\mu$ m-thick coronal sections using a cryostat  
615 (CM3050, Leica). Free-floating sections were washed in tris-buffered saline (TBS), pH 7.5, and then  
616 blocked in 1% bovine serum albumin in TBST (0.25% Triton X-100 in TBS) for 1 h. The sections were  
617 incubated with mouse anti-parvalbumin (1:500; Swant), rabbit anti-somatostatin (1:1000; Peninsula  
618 Laboratories), or rabbit anti-c-Fos (1:500; Calbiochem) antibodies overnight at room temperature. After  
619 primary antibody incubation the slices were washed in TBST, followed by secondary antibody  
620 incubation with Alexa fluor dyes (Thermo Fisher Scientific). Imaging was performed using a Zeiss  
621 LSM780 confocal microscope at 20 or 40X magnification. The investigator performing the analysis was  
622 blind to the animal genotype.

623

## 624 **Statistical analysis.**

625 The following statistical approaches were utilized for experiments assessing ocular dominance  
626 plasticity.  $\chi^2$  test was used to compare at cell level distributions of ocular dominance scores between  
627 two groups and assess for ocular dominance shift. For readability, the histogram figures for distribution  
628 of ocular dominance scores (OD Scores) represent percentage of cells rather than actual cell number.  
629 However the  $\chi^2$  statistics are results of the tests conducted on actual cell number. Cumulative  
630 distributions of ocular dominance index (ODI) were compared at cell level by using the Kolmogorov-  
631 Smirnov (K-S) test. One-way analysis of variance (ANOVA) was used to compare contralateral bias

632 index (CBI) at animal levels and Tukey's multiple comparisons test was used for post hoc analyses. As  
633 justification of the use of a parametric test, normality of the CBI data was tested by using the  
634 D'Agostino-Pearson Test and Shapiro-Wilk Test on any groups where n=mice exceeding the criteria for  
635 the tests (n>8, and n>7 respectively). Normality was confirmed in all groups where the test was  
636 applicable: WT MD, WT no MD, Lypd6 Tg 4d MD, and SST-Lypd6 4d MD. In addition, we applied the  
637 Shapiro-Wilk Test to the CBI data of a key experimental group from our previous study (Smith et al.,  
638 2016) that utilized the same experimental design and statistical analyses for testing ocular dominance  
639 plasticity, and also confirmed normality. Initial comparison of pFS cell (PV interneuron) and SST  
640 interneuron firing rates were conducted using one-way ANOVA with Bonferroni corrected multiple  
641 comparison tests for post hoc analyses. To officially determine the significance of difference in SST and  
642 PV interneuron firing rates, a linear mixed modeling approach was used, from packages LmerTest (v.  
643 2.0.32), lme4 (v. 1.1.12), and lsmeans (v. 2.25) in the R programming language (v. 3.2.2). This model  
644 considered "animal" as a variable with random effect, and "genetic manipulation" (-GFP or -Lypd6) and  
645 "experience" (1d MD or no MD) as variables with fixed effects. Frequency distributions of firing rates in  
646 putative PV interneurons were compared between groups using  $\chi^2$  test. While figure is represented by  
647 fractions of whole,  $\chi^2$  statistics are results of the tests conducted on actual cell number. For all other  
648 experiments including quantification of expression, mean differences between two groups were  
649 determined using Student's *t*-test. A minimum *P* value of 0.05 was accepted as statistically significant.  
650 Other than LMM, all other statistical analyses were performed using Prism 6.0h (GrapPad Software). All  
651 CBI, quantified expression, quantified co-localization, and visually evoked firing rate data are presented  
652 in figures as mean±SEM.

653

654 **Acknowledgments:** This work was supported by National Eye Institute R01EY024918, R01EY  
655 026053, R21EY026702 to H.M., National Institute on Drug Abuse T32 DA007135 to M.P.D., National  
656 Institute of Mental Health T32MH096678 to M.S., Knights Templar Eye Foundation to H.M., March of

657 Dimes to H.M., Whitehall Foundation to H.M., and Brain and Behavior Research Foundation to H.M. AZ  
658 is a member of the Excellence Cluster Immunosensation. We thank Dr. Ming-Hu Han (Icahn School of  
659 Medicine at Mount Sinai) for providing technical expertise on optogenetics; Dr. Yasmin Hurd and Dr.  
660 Michael Michaelides (Icahn School of Medicine at Mount Sinai) for their expertise on chemogenomics.

661

662 **Author Contributions:** M.S., M.P.D., and H.M. designed research; M.S., M.P.D, P.N.B., P.Y., and H.M.  
663 performed research; A.Z. contributed unpublished reagents and provided expertise; M.S., M.P.D,  
664 P.N.B., P.Y., M.R.S., and H.M. analyzed data; M.S., M.P.D, and H.M. wrote the paper.

665

666 **References:**

- 667 1 Hensch, T. K. Critical period regulation. *Annual review of neuroscience* **27**, 549-579,  
668 doi:10.1146/annurev.neuro.27.070203.144327 (2004).
- 669 2 Knudsen, E. I. Sensitive periods in the development of the brain and behavior. *Journal of*  
670 *cognitive neuroscience* **16**, 1412-1425, doi:10.1162/0898929042304796 (2004).
- 671 3 Wiesel, T. N. Postnatal development of the visual cortex and the influence of environment.  
672 *Nature* **299**, 583-591 (1982).
- 673 4 Espinosa, J. S. & Stryker, M. P. Development and plasticity of the primary visual cortex. *Neuron*  
674 **75**, 230-249, doi:10.1016/j.neuron.2012.06.009 (2012).
- 675 5 Morishita, H. & Hensch, T. K. Critical period revisited: impact on vision. *Current opinion in*  
676 *neurobiology* **18**, 101-107, doi:10.1016/j.conb.2008.05.009 (2008).
- 677 6 Hubener, M. & Bonhoeffer, T. Neuronal plasticity: beyond the critical period. *Cell* **159**, 727-737,  
678 doi:10.1016/j.cell.2014.10.035 (2014).
- 679 7 Levelt, C. N. & Hubener, M. Critical-period plasticity in the visual cortex. *Annual review of*  
680 *neuroscience* **35**, 309-330, doi:10.1146/annurev-neuro-061010-113813 (2012).
- 681 8 Deidda, G. *et al.* Early depolarizing GABA controls critical-period plasticity in the rat visual  
682 cortex. *Nature neuroscience* **18**, 87-96, doi:10.1038/nn.3890 (2015).
- 683 9 Huang, Z. J. *et al.* BDNF regulates the maturation of inhibition and the critical period of plasticity  
684 in mouse visual cortex. *Cell* **98**, 739-755 (1999).
- 685 10 Hanover, J. L., Huang, Z. J., Tonegawa, S. & Stryker, M. P. Brain-derived neurotrophic factor  
686 overexpression induces precocious critical period in mouse visual cortex. *The Journal of*  
687 *neuroscience : the official journal of the Society for Neuroscience* **19**, RC40 (1999).
- 688 11 Fagiolini, M. & Hensch, T. K. Inhibitory threshold for critical-period activation in primary visual  
689 cortex. *Nature* **404**, 183-186, doi:10.1038/35004582 (2000).
- 690 12 Chattopadhyaya, B. *et al.* GAD67-mediated GABA synthesis and signaling regulate inhibitory  
691 synaptic innervation in the visual cortex. *Neuron* **54**, 889-903, doi:10.1016/j.neuron.2007.05.015  
692 (2007).
- 693 13 Iwai, Y., Fagiolini, M., Obata, K. & Hensch, T. K. Rapid critical period induction by tonic  
694 inhibition in visual cortex. *The Journal of neuroscience : the official journal of the Society for*  
695 *Neuroscience* **23**, 6695-6702 (2003).
- 696 14 Hensch, T. K. *et al.* Local GABA circuit control of experience-dependent plasticity in developing  
697 visual cortex. *Science* **282**, 1504-1508 (1998).
- 698 15 Sugiyama, S. *et al.* Experience-dependent transfer of Otx2 homeoprotein into the visual cortex  
699 activates postnatal plasticity. *Cell* **134**, 508-520, doi:10.1016/j.cell.2008.05.054 (2008).

- 700 16 Hensch, T. K. Critical period plasticity in local cortical circuits. *Nature reviews. Neuroscience* **6**,  
701 877-888, doi:10.1038/nrn1787 (2005).
- 702 17 Harauzov, A. *et al.* Reducing intracortical inhibition in the adult visual cortex promotes ocular  
703 dominance plasticity. *The Journal of neuroscience : the official journal of the Society for*  
704 *Neuroscience* **30**, 361-371, doi:10.1523/JNEUROSCI.2233-09.2010 (2010).
- 705 18 Southwell, D. G., Froemke, R. C., Alvarez-Buylla, A., Stryker, M. P. & Gandhi, S. P. Cortical  
706 plasticity induced by inhibitory neuron transplantation. *Science* **327**, 1145-1148,  
707 doi:10.1126/science.1183962 (2010).
- 708 19 Tang, Y., Stryker, M. P., Alvarez-Buylla, A. & Espinosa, J. S. Cortical plasticity induced by  
709 transplantation of embryonic somatostatin or parvalbumin interneurons. *Proceedings of the*  
710 *National Academy of Sciences of the United States of America* **111**, 18339-18344,  
711 doi:10.1073/pnas.1421844112 (2014).
- 712 20 Davis, M. F. *et al.* Inhibitory Neuron Transplantation into Adult Visual Cortex Creates a New  
713 Critical Period that Rescues Impaired Vision. *Neuron* **86**, 1055-1066,  
714 doi:10.1016/j.neuron.2015.03.062 (2015).
- 715 21 Yazaki-Sugiyama, Y., Kang, S., Cateau, H., Fukai, T. & Hensch, T. K. Bidirectional plasticity in  
716 fast-spiking GABA circuits by visual experience. *Nature* **462**, 218-221, doi:10.1038/nature08485  
717 (2009).
- 718 22 Kuhlman, S. J. *et al.* A disinhibitory microcircuit initiates critical-period plasticity in the visual  
719 cortex. *Nature* **501**, 543-546, doi:10.1038/nature12485 (2013).
- 720 23 Pizzorusso, T. *et al.* Reactivation of ocular dominance plasticity in the adult visual cortex.  
721 *Science* **298**, 1248-1251, doi:10.1126/science.1072699 (2002).
- 722 24 Beurdeley, M. *et al.* Otx2 binding to perineuronal nets persistently regulates plasticity in the  
723 mature visual cortex. *The Journal of neuroscience : the official journal of the Society for*  
724 *Neuroscience* **32**, 9429-9437, doi:10.1523/JNEUROSCI.0394-12.2012 (2012).
- 725 25 Rudy, B., Fishell, G., Lee, S. & Hjerling-Leffler, J. Three groups of interneurons account for  
726 nearly 100% of neocortical GABAergic neurons. *Developmental neurobiology* **71**, 45-61,  
727 doi:10.1002/dneu.20853 (2011).
- 728 26 Fu, Y., Kaneko, M., Tang, Y., Alvarez-Buylla, A. & Stryker, M. P. A cortical disinhibitory circuit  
729 for enhancing adult plasticity. *eLife* **4**, e05558, doi:10.7554/eLife.05558 (2015).
- 730 27 Tan, Z., Hu, H., Huang, Z. J. & Agmon, A. Robust but delayed thalamocortical activation of  
731 dendritic-targeting inhibitory interneurons. *Proceedings of the National Academy of Sciences of*  
732 *the United States of America* **105**, 2187-2192, doi:10.1073/pnas.0710628105 (2008).
- 733 28 Chen, N., Sugihara, H. & Sur, M. An acetylcholine-activated microcircuit drives temporal  
734 dynamics of cortical activity. *Nature neuroscience* **18**, 892-902, doi:10.1038/nn.4002 (2015).
- 735 29 Pakan, J. M. *et al.* Behavioral-state modulation of inhibition is context-dependent and cell type  
736 specific in mouse visual cortex. *eLife* **5**, doi:10.7554/eLife.14985 (2016).

- 737 30 Dipoppa, M. *et al.* Vision and locomotion shape the interactions between neuron types in mouse  
738 visual cortex. *bioRxiv*, doi:10.1101/058396 (2016).
- 739 31 Polack, P. O., Friedman, J. & Golshani, P. Cellular mechanisms of brain state-dependent gain  
740 modulation in visual cortex. *Nature neuroscience* **16**, 1331-1339, doi:10.1038/nn.3464 (2013).
- 741 32 Fu, Y. *et al.* A cortical circuit for gain control by behavioral state. *Cell* **156**, 1139-1152,  
742 doi:10.1016/j.cell.2014.01.050 (2014).
- 743 33 Reimer, J. *et al.* Pupil fluctuations track fast switching of cortical states during quiet  
744 wakefulness. *Neuron* **84**, 355-362, doi:10.1016/j.neuron.2014.09.033 (2014).
- 745 34 Zhang, S. *et al.* Selective attention. Long-range and local circuits for top-down modulation of  
746 visual cortex processing. *Science* **345**, 660-665, doi:10.1126/science.1254126 (2014).
- 747 35 Lee, S., Kruglikov, I., Huang, Z. J., Fishell, G. & Rudy, B. A disinhibitory circuit mediates motor  
748 integration in the somatosensory cortex. *Nature neuroscience* **16**, 1662-1670,  
749 doi:10.1038/nn.3544 (2013).
- 750 36 Makino, H. & Komiyama, T. Learning enhances the relative impact of top-down processing in  
751 the visual cortex. *Nature neuroscience* **18**, 1116-1122, doi:10.1038/nn.4061 (2015).
- 752 37 Zhao-Shea, R., Liu, L., Pang, X., Gardner, P. D. & Tapper, A. R. Activation of GABAergic  
753 neurons in the interpeduncular nucleus triggers physical nicotine withdrawal symptoms. *Current*  
754 *biology : CB* **23**, 2327-2335, doi:10.1016/j.cub.2013.09.041 (2013).
- 755 38 Leao, R. N. *et al.* OLM interneurons differentially modulate CA3 and entorhinal inputs to  
756 hippocampal CA1 neurons. *Nature neuroscience* **15**, 1524-1530, doi:10.1038/nn.3235 (2012).
- 757 39 Jia, Y., Yamazaki, Y., Nakauchi, S., Ito, K. & Sumikawa, K. Nicotine facilitates long-term  
758 potentiation induction in oriens-lacunosum moleculare cells via Ca<sup>2+</sup> entry through non- $\alpha$ 7  
759 nicotinic acetylcholine receptors. *The European journal of neuroscience* **31**, 463-476,  
760 doi:10.1111/j.1460-9568.2009.07058.x (2010).
- 761 40 Morishita, H., Miwa, J. M., Heintz, N. & Hensch, T. K. Lynx1, a cholinergic brake, limits plasticity  
762 in adult visual cortex. *Science* **330**, 1238-1240, doi:10.1126/science.1195320 (2010).
- 763 41 Miwa, J. M., Lester, H. A. & Walz, A. Optimizing cholinergic tone through lynx modulators of  
764 nicotinic receptors: implications for plasticity and nicotine addiction. *Physiology (Bethesda)* **27**,  
765 187-199, doi:10.1152/physiol.00002.2012 (2012).
- 766 42 Demars, M. P. & Morishita, H. Cortical parvalbumin and somatostatin GABA neurons express  
767 distinct endogenous modulators of nicotinic acetylcholine receptors. *Molecular brain* **7**, 75,  
768 doi:10.1186/s13041-014-0075-9 (2014).
- 769 43 Darvas, M. *et al.* Modulation of the Ca<sup>2+</sup> conductance of nicotinic acetylcholine receptors by  
770 Lypd6. *European neuropsychopharmacology : the journal of the European College of*  
771 *Neuropsychopharmacology* **19**, 670-681, doi:10.1016/j.euroneuro.2009.03.007 (2009).

- 772 44 Miwa, J. M. *et al.* The prototoxin lynx1 acts on nicotinic acetylcholine receptors to balance  
773 neuronal activity and survival in vivo. *Neuron* **51**, 587-600, doi:10.1016/j.neuron.2006.07.025  
774 (2006).
- 775 45 Sadahiro, M., Sajo, M. & Morishita, H. Nicotinic regulation of experience-dependent plasticity in  
776 visual cortex. *Journal of physiology, Paris* **110**, 29-36, doi:10.1016/j.jphysparis.2016.11.003  
777 (2016).
- 778 46 Bukhari, N. *et al.* Unmasking Proteolytic Activity for Adult Visual Cortex Plasticity by the  
779 Removal of Lynx1. *The Journal of neuroscience : the official journal of the Society for*  
780 *Neuroscience* **35**, 12693-12702, doi:10.1523/JNEUROSCI.4315-14.2015 (2015).
- 781 47 Koike, H. *et al.* Chemogenetic Inactivation of Dorsal Anterior Cingulate Cortex Neurons Disrupts  
782 Attentional Behavior in Mouse. *Neuropsychopharmacology : official publication of the American*  
783 *College of Neuropsychopharmacology* **41**, 1014-1023, doi:10.1038/npp.2015.229 (2016).
- 784 48 Heys, J. G., Schultheiss, N. W., Shay, C. F., Tsuno, Y. & Hasselmo, M. E. Effects of  
785 acetylcholine on neuronal properties in entorhinal cortex. *Frontiers in behavioral neuroscience*  
786 **6**, 32, doi:10.3389/fnbeh.2012.00032 (2012).
- 787 49 Ishii, K., Wong, J. K. & Sumikawa, K. Comparison of alpha2 nicotinic acetylcholine receptor  
788 subunit mRNA expression in the central nervous system of rats and mice. *The Journal of*  
789 *comparative neurology* **493**, 241-260, doi:10.1002/cne.20762 (2005).
- 790 50 Tasic, B. *et al.* Adult mouse cortical cell taxonomy revealed by single cell transcriptomics.  
791 *Nature neuroscience* **19**, 335-346, doi:10.1038/nn.4216 (2016).
- 792 51 Lotfipour, S. *et al.* Targeted deletion of the mouse alpha2 nicotinic acetylcholine receptor  
793 subunit gene (Chrna2) potentiates nicotine-modulated behaviors. *The Journal of neuroscience :*  
794 *the official journal of the Society for Neuroscience* **33**, 7728-7741,  
795 doi:10.1523/JNEUROSCI.4731-12.2013 (2013).
- 796 52 Kalogeraki, E., Greifzu, F., Haack, F. & Lowel, S. Voluntary physical exercise promotes ocular  
797 dominance plasticity in adult mouse primary visual cortex. *The Journal of neuroscience : the*  
798 *official journal of the Society for Neuroscience* **34**, 15476-15481,  
799 doi:10.1523/JNEUROSCI.2678-14.2014 (2014).
- 800 53 Hioki, H. *et al.* Cell type-specific inhibitory inputs to dendritic and somatic compartments of  
801 parvalbumin-expressing neocortical interneuron. *The Journal of neuroscience : the official*  
802 *journal of the Society for Neuroscience* **33**, 544-555, doi:10.1523/JNEUROSCI.2255-12.2013  
803 (2013).
- 804 54 Pfeffer, C. K., Xue, M., He, M., Huang, Z. J. & Scanziani, M. Inhibition of inhibition in visual  
805 cortex: the logic of connections between molecularly distinct interneurons. *Nature neuroscience*  
806 **16**, 1068-1076, doi:10.1038/nn.3446 (2013).
- 807 55 Xu, H., Jeong, H. Y., Tremblay, R. & Rudy, B. Neocortical somatostatin-expressing GABAergic  
808 interneurons disinhibit the thalamorecipient layer 4. *Neuron* **77**, 155-167,  
809 doi:10.1016/j.neuron.2012.11.004 (2013).



- 810 56 Sturgill, J. F. & Isaacson, J. S. Somatostatin cells regulate sensory response fidelity via  
811 subtractive inhibition in olfactory cortex. *Nature neuroscience* **18**, 531-535, doi:10.1038/nn.3971  
812 (2015).
- 813 57 Hu, H., Ma, Y. & Agmon, A. Submillisecond firing synchrony between different subtypes of  
814 cortical interneurons connected chemically but not electrically. *The Journal of neuroscience : the*  
815 *official journal of the Society for Neuroscience* **31**, 3351-3361, doi:10.1523/JNEUROSCI.4881-  
816 10.2011 (2011).
- 817 58 Cottam, J. C., Smith, S. L. & Hausser, M. Target-specific effects of somatostatin-expressing  
818 interneurons on neocortical visual processing. *The Journal of neuroscience : the official journal*  
819 *of the Society for Neuroscience* **33**, 19567-19578, doi:10.1523/JNEUROSCI.2624-13.2013  
820 (2013).
- 821 59 Urban, D. J. & Roth, B. L. DREADDs (designer receptors exclusively activated by designer  
822 drugs): chemogenetic tools with therapeutic utility. *Annual review of pharmacology and*  
823 *toxicology* **55**, 399-417, doi:10.1146/annurev-pharmtox-010814-124803 (2015).
- 824 60 Ozhan, G. *et al.* Lypd6 enhances Wnt/beta-catenin signaling by promoting Lrp6 phosphorylation  
825 in raft plasma membrane domains. *Developmental cell* **26**, 331-345,  
826 doi:10.1016/j.devcel.2013.07.020 (2013).
- 827 61 Thomsen, M. S. *et al.* Expression of the Ly-6 family proteins Lynx1 and Ly6H in the rat brain is  
828 compartmentalized, cell-type specific, and developmentally regulated. *Brain structure & function*  
829 **219**, 1923-1934, doi:10.1007/s00429-013-0611-x (2014).
- 830 62 Arvaniti, M. *et al.* Functional interaction between Lypd6 and nicotinic acetylcholine receptors.  
831 *Journal of neurochemistry* **138**, 806-820, doi:10.1111/jnc.13718 (2016).
- 832 63 Marchi, M. & Grilli, M. Presynaptic nicotinic receptors modulating neurotransmitter release in the  
833 central nervous system: functional interactions with other coexisting receptors. *Progress in*  
834 *neurobiology* **92**, 105-111, doi:10.1016/j.pneurobio.2010.06.004 (2010).
- 835 64 Mikuni, T., Nishiyama, J., Sun, Y., Kamasawa, N. & Yasuda, R. High-Throughput, High-  
836 Resolution Mapping of Protein Localization in Mammalian Brain by In Vivo Genome Editing. *Cell*  
837 **165**, 1803-1817, doi:10.1016/j.cell.2016.04.044 (2016).
- 838 65 Poorthuis, R. B., Bloem, B., Verhoog, M. B. & Mansvelder, H. D. Layer-specific interference with  
839 cholinergic signaling in the prefrontal cortex by smoking concentrations of nicotine. *The Journal*  
840 *of neuroscience : the official journal of the Society for Neuroscience* **33**, 4843-4853,  
841 doi:10.1523/JNEUROSCI.5012-12.2013 (2013).
- 842 66 Gulledge, A. T., Park, S. B., Kawaguchi, Y. & Stuart, G. J. Heterogeneity of phasic cholinergic  
843 signaling in neocortical neurons. *Journal of neurophysiology* **97**, 2215-2229,  
844 doi:10.1152/jn.00493.2006 (2007).
- 845 67 Porter, J. T. *et al.* Selective excitation of subtypes of neocortical interneurons by nicotinic  
846 receptors. *The Journal of neuroscience : the official journal of the Society for Neuroscience* **19**,  
847 5228-5235 (1999).

- 848 68 Alitto, H. J. & Dan, Y. Cell-type-specific modulation of neocortical activity by basal forebrain  
849 input. *Frontiers in systems neuroscience* **6**, 79, doi:10.3389/fnsys.2012.00079 (2012).
- 850 69 Jiang, X. *et al.* Principles of connectivity among morphologically defined cell types in adult  
851 neocortex. *Science* **350**, aac9462, doi:10.1126/science.aac9462 (2015).
- 852 70 Gerfen, C. R., Paletzki, R. & Heintz, N. GENSAT BAC cre-recombinase driver lines to study the  
853 functional organization of cerebral cortical and basal ganglia circuits. *Neuron* **80**, 1368-1383,  
854 doi:10.1016/j.neuron.2013.10.016 (2013).
- 855 71 Kolisnyk, B. *et al.* ChAT-ChR2-EYFP mice have enhanced motor endurance but show deficits in  
856 attention and several additional cognitive domains. *The Journal of neuroscience : the official*  
857 *journal of the Society for Neuroscience* **33**, 10427-10438, doi:10.1523/JNEUROSCI.0395-  
858 13.2013 (2013).
- 859 72 Nakauchi, S., Brennan, R. J., Boulter, J. & Sumikawa, K. Nicotine gates long-term potentiation  
860 in the hippocampal CA1 region via the activation of alpha2\* nicotinic ACh receptors. *The*  
861 *European journal of neuroscience* **25**, 2666-2681, doi:10.1111/j.1460-9568.2007.05513.x  
862 (2007).
- 863 73 van Versendaal, D. *et al.* Elimination of inhibitory synapses is a major component of adult ocular  
864 dominance plasticity. *Neuron* **74**, 374-383, doi:10.1016/j.neuron.2012.03.015 (2012).
- 865 74 Chen, J. L. *et al.* Clustered dynamics of inhibitory synapses and dendritic spines in the adult  
866 neocortex. *Neuron* **74**, 361-373, doi:10.1016/j.neuron.2012.02.030 (2012).
- 867 75 Lazarus, M. S. & Huang, Z. J. Distinct maturation profiles of perisomatic and dendritic targeting  
868 GABAergic interneurons in the mouse primary visual cortex during the critical period of ocular  
869 dominance plasticity. *Journal of neurophysiology* **106**, 775-787, doi:10.1152/jn.00729.2010  
870 (2011).
- 871 76 Wang, J. *et al.* An Accessory Agonist Binding Site Promotes Activation of alpha4beta2\* Nicotinic  
872 Acetylcholine Receptors. *The Journal of biological chemistry* **290**, 13907-13918,  
873 doi:10.1074/jbc.M115.646786 (2015).
- 874 77 Wang, J. *et al.* A Novel alpha2/alpha4 Subtype-selective Positive Allosteric Modulator of  
875 Nicotinic Acetylcholine Receptors Acting from the C-tail of an alpha Subunit. *The Journal of*  
876 *biological chemistry* **290**, 28834-28846, doi:10.1074/jbc.M115.676551 (2015).
- 877 78 Timmermann, D. B. *et al.* Augmentation of cognitive function by NS9283, a stoichiometry-  
878 dependent positive allosteric modulator of alpha2- and alpha4-containing nicotinic acetylcholine  
879 receptors. *British journal of pharmacology* **167**, 164-182, doi:10.1111/j.1476-5381.2012.01989.x  
880 (2012).
- 881 79 Reimers, K., Emmert, N., Shah, H., Benedict, R. H. & Szigeti, K. Capgras-like visual  
882 decomposition in Lewy body dementia with therapeutic response to donepezil. *Neurology.*  
883 *Clinical practice* **4**, 467-469, doi:10.1212/CPJ.000000000000068 (2014).
- 884 80 Klassen, T. *et al.* Exome sequencing of ion channel genes reveals complex profiles confounding  
885 personal risk assessment in epilepsy. *Cell* **145**, 1036-1048, doi:10.1016/j.cell.2011.05.025  
886 (2011).

- 887 81 Conti, V. *et al.* Nocturnal frontal lobe epilepsy with paroxysmal arousals due to CHRNA2 loss of  
888 function. *Neurology* **84**, 1520-1528, doi:10.1212/WNL.0000000000001471 (2015).
- 889 82 Yang, J. *et al.* The contribution of rare and common variants in 30 genes to risk nicotine  
890 dependence. *Molecular psychiatry*, doi:10.1038/mp.2014.156 (2014).
- 891 83 Won, H. *et al.* Chromosome conformation elucidates regulatory relationships in developing  
892 human brain. *Nature* **538**, 523-527, doi:10.1038/nature19847 (2016).
- 893 84 Tai, C., Abe, Y., Westenbroek, R. E., Scheuer, T. & Catterall, W. A. Impaired excitability of  
894 somatostatin- and parvalbumin-expressing cortical interneurons in a mouse model of Dravet  
895 syndrome. *Proceedings of the National Academy of Sciences of the United States of America*  
896 **111**, E3139-3148, doi:10.1073/pnas.1411131111 (2014).
- 897 85 Paluszkiwicz, S. M., Olmos-Serrano, J. L., Corbin, J. G. & Huntsman, M. M. Impaired inhibitory  
898 control of cortical synchronization in fragile X syndrome. *Journal of neurophysiology* **106**, 2264-  
899 2272, doi:10.1152/jn.00421.2011 (2011).
- 900 86 Hashimoto, T. *et al.* Conserved regional patterns of GABA-related transcript expression in the  
901 neocortex of subjects with schizophrenia. *The American journal of psychiatry* **165**, 479-489,  
902 doi:10.1176/appi.ajp.2007.07081223 (2008).
- 903 87 Fung, S. J. *et al.* Expression of interneuron markers in the dorsolateral prefrontal cortex of the  
904 developing human and in schizophrenia. *The American journal of psychiatry* **167**, 1479-1488,  
905 doi:10.1176/appi.ajp.2010.09060784 (2010).
- 906 88 Lin, L. C. & Sibille, E. Reduced brain somatostatin in mood disorders: a common  
907 pathophysiological substrate and drug target? *Frontiers in pharmacology* **4**, 110,  
908 doi:10.3389/fphar.2013.00110 (2013).
- 909 89 Zhang, W. *et al.* Hyperactive somatostatin interneurons contribute to excitotoxicity in  
910 neurodegenerative disorders. *Nature neuroscience* **19**, 557-559, doi:10.1038/nn.4257 (2016).
- 911 90 Schmid, L. C. *et al.* Dysfunction of Somatostatin-Positive Interneurons Associated with Memory  
912 Deficits in an Alzheimer's Disease Model. *Neuron* **92**, 114-125,  
913 doi:10.1016/j.neuron.2016.08.034 (2016).
- 914

915 **Figure Legends**

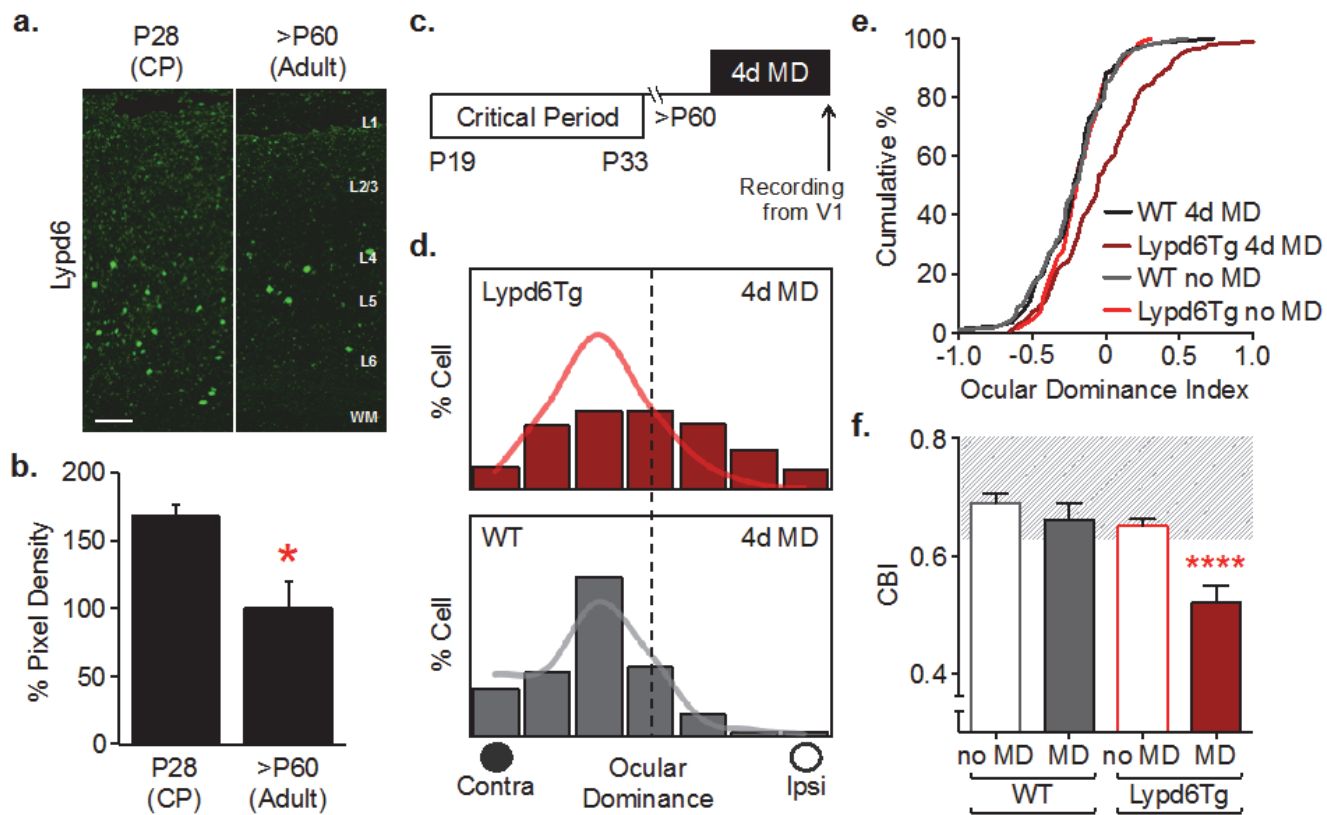

916  
917

918 **Figure 1 | Neuronal overexpression of Lypd6 prolongs ocular dominance plasticity into**  
 919 **adulthood. (a)** Representative images of fluorescent *in situ* hybridization labeling of *Lypd6* mRNA in V1  
 920 binocular zone from critical period (CP: P28) and adult (>P60) mice. Scale bar=100µm. **(b)**  
 921 Quantification of *Lypd6 mRNA* expression in V1 of P28 and >P60 mice. Data are mean±SEM of pixel  
 922 intensity normalized to adult data. *Lypd6* level is higher in CP mice in comparison to Adult mice [CP:  
 923 P28, n=4 mice; Adult: >P60, n=3 mice]: \**P*=0.02, Student's *t*-test. Data are mean±SEM. **(c)** Schematic  
 924 representation of V1 plasticity paradigm by 4 days of monocular deprivation (4d MD) in adult (>P60)  
 925 *Lypd6Tg* or WT mice. **(d)** Adult 4d MD results in a shift in ocular dominance distribution of *Lypd6Tg*  
 926 mice [red bar histogram; n=179 cells from 9 mice] but not in WT mice [gray bar histogram; n=86 cells  
 927 from 7 mice]: \*\*\*\**P*<0.0001. *Lypd6Tg* 4d MD vs. *Lypd6Tg* no MD [red line histogram; n=67 cells from 4  
 928 mice]: \*\*\*\**P*<0.0001. *Lypd6Tg* no MD vs. WT no MD [gray line histogram; n=193 cells from 11 mice]:

929  $P=0.28$ ,  $\chi^2$  test.  $\chi^2$  tests were conducted based on actual cell numbers recorded. Histograms from  
930 groups for main comparisons are presented in bar format. Other control groups are overlaid in line  
931 format. Histograms are presented in percentage of cells representing each ocular dominance score.  
932 Filled circle labeled as “contra” represents contralateral eye that received monocular deprivation in MD  
933 designated groups, whereas empty circle labeled as “ipsi” represents the ipsilateral non-deprived  
934 eye. **(e)** Cumulative plot of quantified spike response of each unit (ocular dominance index) after adult  
935 4d MD confirms ocular dominance shift in Lypd6Tg mice [red line; n=179 cells from 9 mice] but not in  
936 WT mice [black line; n=86 cells from 7 mice]: \*\*\*\* $P<0.0001$ . Lypd6Tg 4d MD vs. Lypd6Tg no MD [bright  
937 red line; n=67 cells from 4 mice]: \*\*\* $P=0.0002$ . Lypd6Tg no MD vs. WT no MD [gray line; n=193 cells  
938 from 11 mice]:  $P=0.2332$ , Kolmogorov-Smirnov (K-S) test. **(f)** Comparison of contralateral bias index  
939 (CBI) following adult 4d MD in WT mice [gray solid bar; CBI=0.66, n=7 mice] and Lypd6Tg mice [red  
940 solid bar; CBI=0.52, n=9 mice], or no MD in WT mice [gray open bar; CBI=0.66, n=11 mice] and  
941 Lypd6Tg mice [red open bar; CBI=0.65, n=4 mice]: \*\*\*\* $P<0.0001$ , one-way analysis of variance  
942 (ANOVA). Lypd6Tg 4d MD significantly differs from all other groups: WT no MD, WT4d MD, and  
943 Lypd6Tg no MD: respectively, \*\*\*\* $P<0.0001$ , \*\* $P=0.0023$ , and \* $P=0.0208$ ; Tukey’s multiple  
944 comparisons test. Gray background area represents CBI range in a non-plastic mouse. Data are  
945 mean $\pm$ SEM.  
946

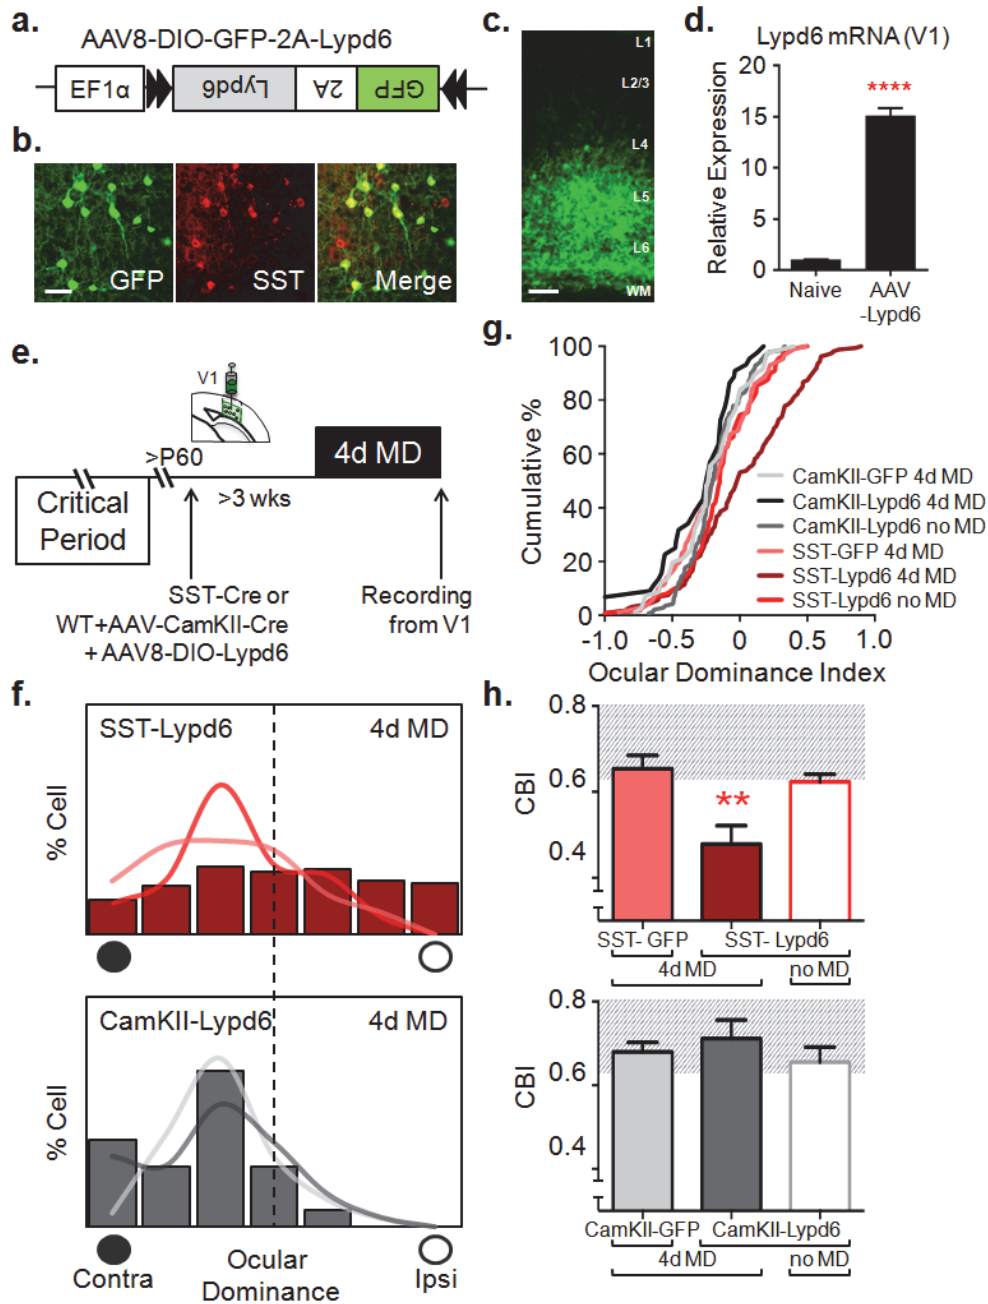

947

948 **Figure 2 | Selective overexpression of Lypd6 specifically in SST interneurons reactivates ocular**  
 949 **dominance plasticity in adult V1. (a)** Schematic representation of adeno-associated viral (AAV)  
 950 construct for cre-dependent Lypd6 over-expression. Bicistronic expression of GFP and Lypd6 is  
 951 achieved through the use of a 2A sequence. **(b)** Representative images of viral GFP labeling following  
 952 injection of AAV8-DIO-GFP-2A-Lypd6 (AAV-Lypd6) into V1 of SST-cre mice. Immunohistochemical

953 labeling shows specific expression of GFP (green) overlapping immunolabeled SST (red) neurons.  
954  $98 \pm 1.52\%$  of GFP labeled cells co-labeled with SST [n=2 mice]. Data are mean $\pm$ SEM. Scale  
955 Bar=50 $\mu$ m. **(c)** Representative image of V1 layers following injection of AAV-Lypd6 targeting the deep  
956 layers in SST-Cre mice. Viral transduction represented by GFP (green) labeling is concentrated in  
957 layers V and VI. Scale Bar=100 $\mu$ m. **(d)** Quantitative PCR of *Lypd6* mRNA from cDNA derived from  
958 whole V1 extracts of naïve and AAV-Lypd6 injected SST-cre mice [ $\Delta\Delta$ CT method, n=3 mice]:  
959 \*\*\*\* $P < 0.0001$ , Student's *t*-test. Data are mean $\pm$ SEM. **(e)** Schematic representation of V1 plasticity  
960 paradigm by 4 days of monocular deprivation (4d MD) with viral injection. AAV-Lypd6 was injected into  
961 binocular zone of V1 of adult (>P60) SST-cre mice (SST-Lypd6), or as a cocktail with AAV-CamKII-cre  
962 in >P60 WT mice (CamKII-Lypd6) and incubated for >3 weeks prior to 4d MD. **(f)** Adult 4d MD results  
963 in a shift in ocular dominance distribution of SST-Lypd6 mice [red bar histogram; n=158 cells from 9  
964 mice] but not in WT mice injected with a cocktail of AAV-CamKII-cre and AAV-Lypd6 (CamKII-Lypd6)  
965 [gray bar histogram; n=44 cells from 3 mice]: \*\*\*\* $P < 0.0001$ . SST-Lypd6 4d MD: vs. SST-Lypd6 no MD  
966 [red line histogram; n=110 cells from 5 mice]: \*\*\*\* $P < 0.0001$ , vs. SST-GFP 4d MD [pink line histogram;  
967 n=86 cells from 5 mice]: \*\*\* $P = 0.0006$ . CamKII-Lypd6 4d MD vs. CamKII-GFP 4d MD [gray line  
968 histogram; n=81 cells from 4 mice]:  $P = 0.67$ ,  $\chi^2$  test. **(g)** Cumulative plot of ocular dominance index after  
969 adult 4d MD confirms ocular dominance shift in SST-Lypd6 mice [red line; n=158 cells from 9 mice] but  
970 not in CamKII-Lypd6 mice [black line; n=44 cells from 3 mice]: \*\*\*\* $P < 0.0001$ . SST-Lypd6 4d MD: vs.  
971 SST-Lypd6 no MD [bright red line; n=110 cells from 5 mice]: \*\*\* $P = 0.0001$ , vs. SST-GFP 4d MD [pink  
972 line; n=86 cells from 5 mice]: \*\*\* $P = 0.0002$ . CamKII-Lypd6 4d MD vs. CamKII-GFP 4d MD [light gray  
973 line; n=81 cells from 4 mice]:  $P = 0.49$ , K-S test. **(h)** Comparison of contralateral bias index (CBI)  
974 following adult 4d MD in SST-GFP [pink solid bar; CBI=0.65, n=5 mice], SST-Lypd6 [red solid bar;  
975 CBI=0.48, n=9 mice], CamKII-GFP [light gray solid bar; CBI=0.68, n=4 mice] and CamKII-Lypd6 mice  
976 [dark gray solid bar; CBI=0.71, n=3 mice] with non-deprived SST-Lypd6 [red open bar; CBI=0.62, n=5  
977 mice] and non-deprived CamKII-Lypd6 [gray open bar; CBI=0.66, n=5 mice]: \*\* $P = 0.0014$ , one-way  
978 ANOVA. SST-Lypd6 4d MD significantly differs from: SST-Lypd6 no MD, SST-GFP 4d MD, and

979 CamKII-Lypd6 4d MD: respectively,  $**P=0.0477$ ,  $**P=0.0183$ , and  $***P=0.0073$ . CamKII-Lypd6 4d MD  
980 does not differ from CamKII-Lypd6 no MD or CamKII-GFP 4d MD: respectively,  $P=0.9527$ , and  
981  $P=0.9969$ ; Tukey's multiple comparisons test. Gray background area represents CBI range in a non-  
982 plastic mouse. Data are mean $\pm$ SEM.  
983



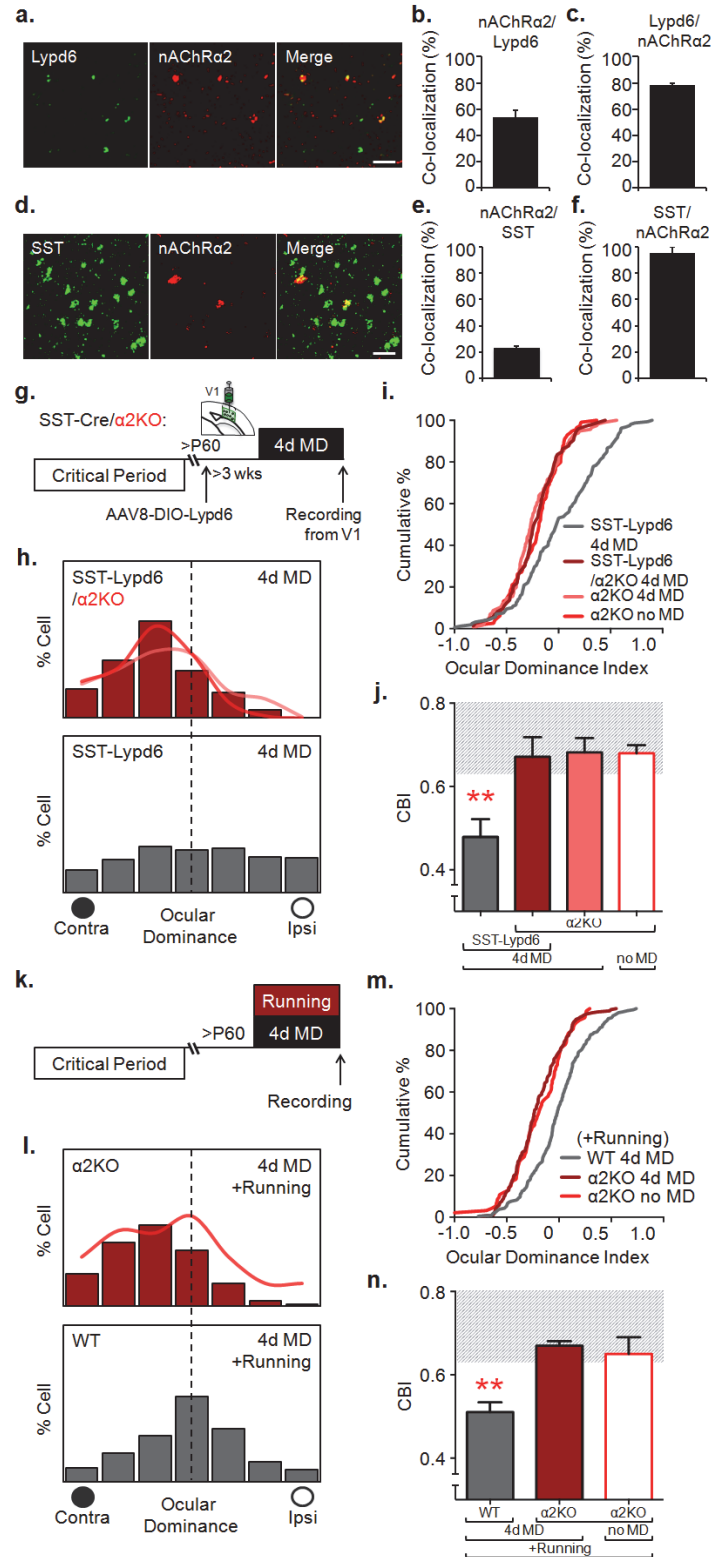

984

985 **Figure 3 |  $\alpha 2$  nicotinic acetylcholine receptor subunit is required for reactivation of ocular**  
 986 **dominance plasticity in adulthood. (a) Representative images of double fluorescent *in situ***

987 hybridization labeling of mRNA in V1 for *Lypd6* (green) and  $\alpha 2$  *nicotinic acetylcholine receptor*  
988 (*nAChRa2*) (red). Scale bar=50 $\mu$ m. **(b)** 53 $\pm$ 3.26% of *Lypd6* mRNA labeled cells co-express *nAChRa2*  
989 mRNA. [n=2 mice]. **(c)** 79 $\pm$ 2.93% of *nAChRa2* mRNA labeled cell co-express *Lypd6* mRNA. [n=2 mice].  
990 Data are mean $\pm$ SEM. **(d)** Representative images of double fluorescent *in situ* hybridization labeling of  
991 mRNA in V1 for *SST* (green) and  $\alpha 2$  *nicotinic acetylcholine receptor* (*nAChRa2*) (red). Scale bar=50 $\mu$ m.  
992 **(e)** 23 $\pm$ 0.01% of *SST* mRNA labeled cell co-express *nAChRa2* mRNA. [n= 2 mice]. **(f)** 95 $\pm$ 0.04% of  
993 *nAChRa2* mRNA labeled cells co-express *SST* mRNA. [n=2 mice]. Data are mean $\pm$ SEM. **(g)**  
994 Schematic representation of experiment for **h-j**; V1 plasticity paradigm by 4 days of monocular  
995 deprivation (4d MD) with viral injection. AAV-*Lypd6* was injected into V1 binocular zone of adult (>P60)  
996 bigenic *SST-cre/Chrna2KO* mice (*SST-Lypd6/* $\alpha$ 2KO), or >P60 *SST-cre* mice (*SST-Lypd6*) and  
997 incubated for >3 weeks prior to 4d MD. **(h)** Adult 4d MD results in a significantly decreased shift in  
998 ocular dominance distribution of bigenic *SST-Lypd6/* $\alpha$ 2KO mice [red bar histogram; n=73 cells from 5  
999 mice] when compared with ocular dominance shift in adult 4d MD *SST-Lypd6* mice [gray bar histogram;  
1000 data in Fig. 2e legend]: \*\*\*\* $P$ <0.0001. *SST-Lypd6/* $\alpha$ 2KO 4d MD vs.  $\alpha$ 2KO 4d MD [pink line histogram;  
1001 n=116 cells from 3 mice]:  $P$ =0.62.  $\alpha$ 2KO 4d MD vs.  $\alpha$ 2KO no MD [red line histogram; n=114 cells from  
1002 4 mice]:  $P$ =0.24,  $\chi^2$  test. **(i)** Cumulative plot of ocular dominance index after adult 4d MD confirms  
1003 significant ablation of ocular dominance shift in absence of *nAChRa2* in deprived *SST-Lypd6/* $\alpha$ 2KO  
1004 mice [red line; n=73 cells from 5 mice] compared with *SST-Lypd6* mice [gray line; data in Fig. 2f  
1005 legend]: \*\*\*\* $P$ <0.0001. *SST-Lypd6/* $\alpha$ 2KO 4d MD vs.  $\alpha$ 2KO 4d MD [pink line; n=116 cells from 3 mice]:  
1006  $P$ =0.64.  $\alpha$ 2KO 4d MD vs.  $\alpha$ 2KO no MD [bright red line; n=114 cells from 4 mice]:  $P$ =0.06, K-S test. **(j)**  
1007 Comparison of contralateral bias index (CBI) following adult 4d MD in *SST-Lypd6* mice [gray solid bar;  
1008 data in Fig. 2g legend], *SST-Lypd6/* $\alpha$ 2KO mice [red solid bar; CBI=0.66, n=5 mice], and  $\alpha$ 2KO mice  
1009 [pink solid bar; CBI=0.68, n=3 mice], or no MD in  $\alpha$ 2KO mice [bright red open bar; CBI=0.68, n=4 mice]:  
1010 \*\* $P$ =0.0053, one-way ANOVA. *SST-Lypd6/* $\alpha$ 2KO 4d MD is only significantly different with *SST-Lypd6*  
1011 4d MD: \* $P$ =0.0209, and is not different from  $\alpha$ 2KO 4d MD:  $P$ =0.9990.  $\alpha$ 2KO 4d MD vs.  $\alpha$ 2KO no MD:  
1012  $P$ >0.9999; Tukey's multiple comparisons test. Gray background area represents CBI range in a non-

1013 plastic mouse. Data are mean±SEM. **(k)** Schematic representation of experiment for **I-n**; V1 plasticity  
1014 paradigm by 4 days of monocular deprivation (4d MD) with simultaneous 4 days of voluntary physical  
1015 exercise through the use of a running wheel (Running) in single housed adult (>P60) *Chrna2*KO and  
1016 WT mice. **(l)** Adult 4d MD with simultaneous Running results in a shift in ocular dominance distribution  
1017 of WT mice [gray bar histogram; n=207 cells from 5 mice] but not in *Chrna2*KO mice [red bar  
1018 histogram; n=194 cells from 4 mice]: \*\*\*\* $P < 0.0001$ ,  $\chi^2$  test. *Chrna2*KO 4d MD +Running vs *Chrna2*KO  
1019 no MD+ Running [red line histogram; n=93 cells from 4 mice]:  $P = 0.35$ ,  $\chi^2$  test. **(m)** Cumulative plot of  
1020 ocular dominance index after adult 4d MD with simultaneous Running confirms ocular dominance shift  
1021 in WT mice [gray line; n=207 cells from 5 mice] but not in *Chrna2*KO mice [red line; n=194 cells from 4  
1022 mice]: \*\*\*\* $P < 0.0001$ . *Chrna2*KO 4d MD+Running vs. *Chrna2*KO no MD+Running:  $P = 0.33$ , K-S test. **(n)**  
1023 Comparison of contralateral bias index (CBI) following adult 4d MD with simultaneous Running in WT  
1024 mice [gray solid bar; CBI=0.51, n=5 mice] and *Chrna2*KO mice [red solid bar; CBI=0.67, n=4 mice], or  
1025 no MD with simultaneous Running in *Chrna2*KO mice [red open bar; CBI=0.65, n=4 mice]: \*\* $P = 0.0030$ ,  
1026 one-way ANOVA. *Chrna2*KO 4d MD+Running vs WT 4d MD+Running: \*\* $P = 0.0046$ , vs *Chrna2*KO no  
1027 MD+Running: \*\* $P = 0.0103$ ; Tukey's multiple comparisons test. Gray background area represents CBI  
1028 range in a non-plastic mouse. Data are mean±SEM.

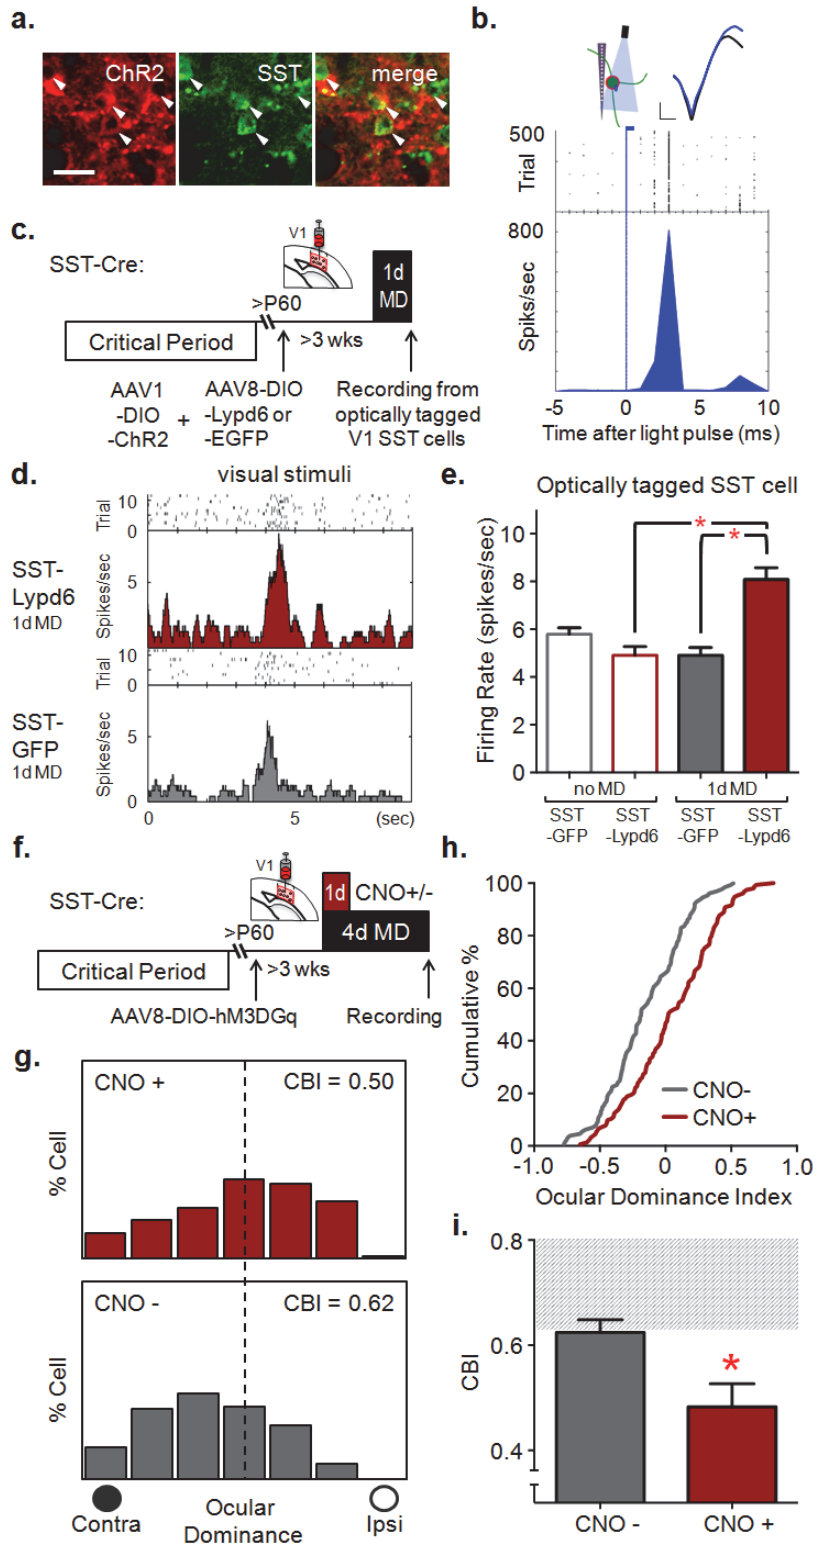

1029

1030 **Figure 4 | Lypd6 in SST interneurons increase SST interneuron activity to express ocular**  
 1031 **dominance plasticity. (a)** Representative images of viral mCherry labeling following injection of AAV-

1032 DIO-hChR2 (AAV-ChR2) into the V1 of SST-cre mice. ChR2/mCherry (red) is specifically expressed in  
1033 immunolabeled SST (green) neuron.  $95\pm 1.86\%$  of mCherry labeled cells co-labeled with SST. [n=2  
1034 mice]. Data are mean $\pm$ SEM. Scale bar=25 $\mu$ m. **(b)** Example of an optically-tagged SST interneuron  
1035 showing time locked optogenetic activation. Laser (wavelength 473 nm, fiber diameter 105  $\mu$ m) was  
1036 delivered using an optic fiber coupled to the multichannel extracellular recording electrode. The fiber tip  
1037 was positioned immediately above the V1 recording site. SST+ cells were identified with a light pulse  
1038 (1ms, 20Hz) stimulus. **(c)** Schematic representation of experiments in **d-e**. Adult (>P60) SST-cre mice  
1039 were injected with a combination of AAV-ChR2 and either AAV-Lypd6 (SST-Lypd6) or AAV-EGFP  
1040 (SST-GFP) into V1 binocular zone and incubated for >3 weeks prior to 1 day of monocular deprivation  
1041 (1d MD), after which extracellular recordings were conducted to collect and analyze visually evoked  
1042 firing rates of optically-tagged SST interneurons. **(d)** Representative histograms of visually evoked firing  
1043 of optically-tagged SST interneurons after adult 1d MD in SST-Lypd6 [top, red] and SST-GFP [gray,  
1044 bottom]. **(e)** Comparison of visually evoked firing rate following adult 1d MD in SST-GFP [gray solid bar;  
1045 n=68 cells, 4 mice] and SST-Lypd6 [red solid bar; n=101 cells, 5 mice] with non-deprived (no MD) SST-  
1046 GFP [gray open bar; n=82 cells, 5 mice] and SST-Lypd6 [red open bar; n=38 cells, 3 mice]. Data are  
1047 mean $\pm$ SEM. Overexpression of Lypd6 results in a significant increase in visually evoked firing rate of  
1048 SST interneurons after 1d MD (SST-Lypd6 1d MD) in comparison to SST-GFP 1d MD and SST-Lypd6  
1049 no MD (respectively, \* $P=0.0137$  and \* $P=0.0339$ , *Linear Mixed Model (LMM)* – animal considered as  
1050 random effect, genetic manipulation (-GFP or -Lypd6) and experience (1d MD or no MD) considered as  
1051 fixed effects; multiple comparisons corrected by Tukey's method). **(f)** Schematic representation of V1  
1052 plasticity paradigm by 4 days of monocular deprivation (4d MD) with viral injection. AAV8-DIO-  
1053 hM4D(Gq)-mCherry (AAV8-GqDREADD) was injected into V1 binocular zone of adult (>P60) SST-cre  
1054 mice and incubated for >3 weeks prior to 4d MD. CNO (CNO+) or saline (CNO-) was given during the  
1055 first day of 4d MD to chemogenetically activate viral GqDREADD expressing SST interneurons for only  
1056 1 day. Following 4d MD, extracellular recordings were performed for analysis of ocular dominance. **(g)**  
1057 Chemogenetic activation of SST interneurons during the first day of 4d MD through CNO delivery

1058 [CNO+: red, n=154 cells from 5 mice] results in a significant shift in ocular dominance distribution, but  
1059 not when given saline [CNO-: gray, n=129 cells from 5 mice]: \*\*\* $P=0.0007$ ,  $\chi^2$  test. **(h)** Cumulative plot  
1060 of ocular dominance index after adult 4d MD confirms ocular dominance shift after 1 day-activation of  
1061 SST interneurons in CNO+ mice [red line, n=154 cells from 5 mice] compared with CNO- [gray line,  
1062 n=129 cells from 5 mice]: \*\* $P<0.0001$ , K-S test. **(i)** Comparison of contralateral bias index (CBI)  
1063 following 4d MD in SST-cre mice injected with AAV-GqDREADD and administered either CNO [CNO+:  
1064 red solid bar, CBI=0.50; n=5 mice] or saline [CNO-: gray solid bar, CBI=0.62; n=5 mice] during the first  
1065 day of 4d MD: \* $P=0.0208$ , Student's *t*-test. Gray background area represents CBI range in a non-plastic  
1066 mouse. Data are mean $\pm$ SEM.

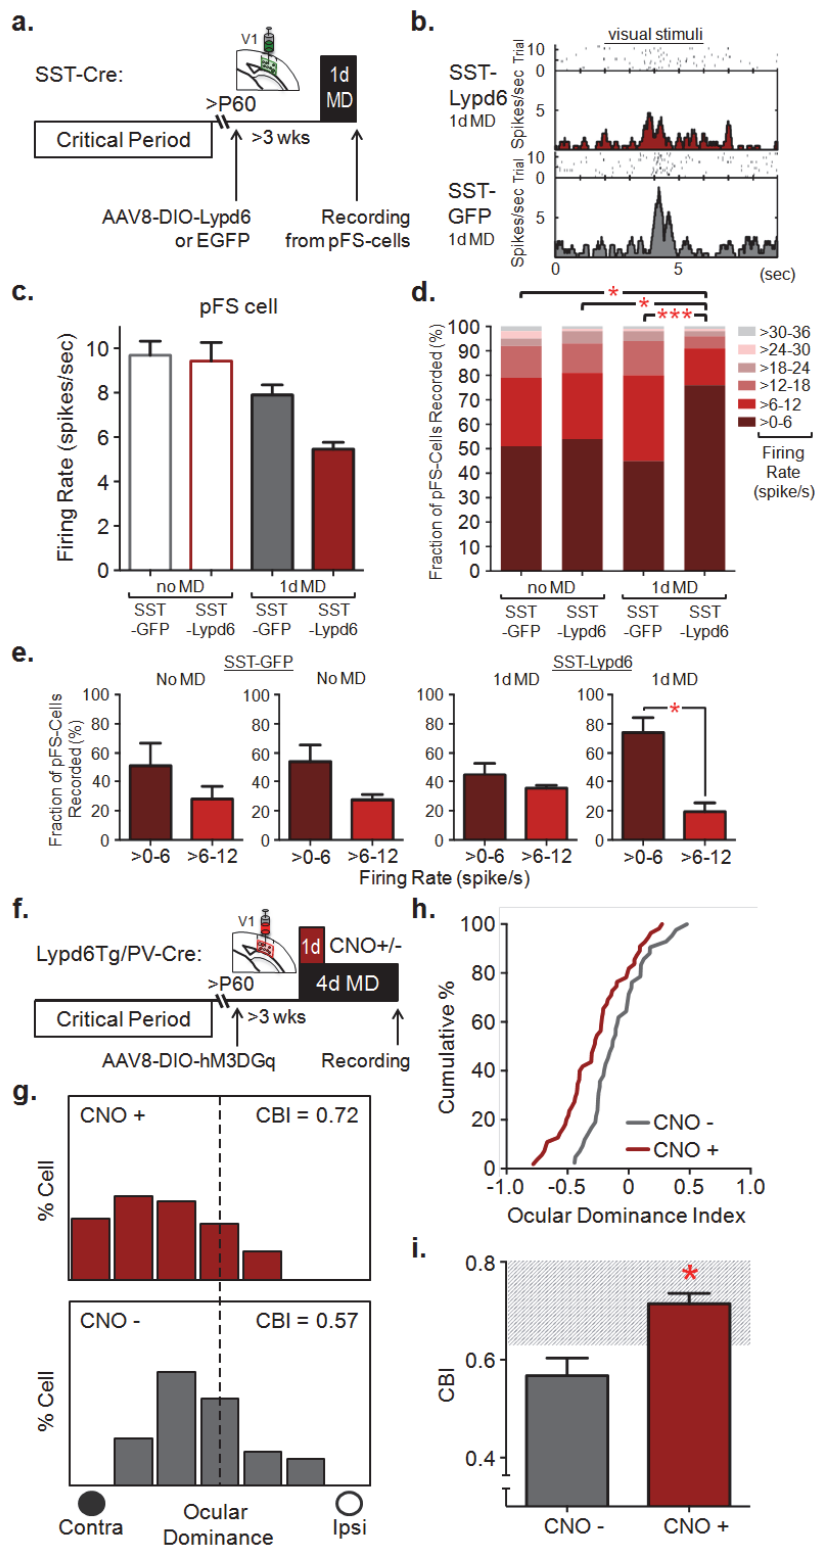

1067

1068 **Figure 5 | Lypd6 in SST interneurons suppress PV interneuron activity to express ocular**

1069 **dominance plasticity.** (a) Schematic representation of experiments in b-c. Adult (>P60) SST-cre mice

1070 were injected with AAV-Lypd6 (SST-Lypd6) or AAV-EGFP (SST-GFP) into V1 binocular zone and  
1071 incubated for >3 weeks prior to 1 day of monocular deprivation (1d MD), after which extracellular  
1072 recordings were conducted to collect and analyze visually evoked firing rates of putative fast-spiking  
1073 (pFS) cells sorted by their narrow spike width. For sorting details see *Methods* and *Supplemental*  
1074 *Figure 2*. (b) Representative histograms of visually evoked firing of pFS cells after adult 1d MD in SST-  
1075 Lypd6 [top, red] and SST-GFP [gray, bottom]. (c) Comparison of cell-level means of visually evoked  
1076 firing rate using standard binomial tests show significant decrease in visually evoked firing rate of pFS  
1077 cells in SST-Lypd6 1d MD [red solid bar; n=170 cells, 7 mice], in comparison to all other groups: SST-  
1078 GFP 1d MD [gray solid bar; n=148 cells, 5 mice], SST-Lypd6 no MD [red open bar; n=63 cells, 4 mice],  
1079 and SST-GFP no MD [gray open bar; n=116 cells, 5 mice]: \*\*\*\* $P < 0.0001$ , one-way analysis of variance  
1080 (ANOVA). Significance for each comparisons are respectively, \*\*\* $P = 0.0007$ , \*\*\*\* $P < 0.0001$ , and  
1081 \*\*\*\* $P < 0.0001$ ; Bonferroni's multiple comparisons test. When fitted to a *Linear Mixed Model (LMM)*,  
1082 SST-Lypd6 1d MD group shows a trending reduction with no statistical significance in comparison to all  
1083 other groups, confirmed by pairwise tests with SST-GFP 1d MD, SST-Lypd6 no MD, and SST-GFP no  
1084 MD (respectively,  $P = 0.211$ ,  $P = 0.2301$ , and  $P = 0.1161$  – animal considered as random effect, genetic  
1085 manipulation (-GFP or -Lypd6) and experience (1d MD or no MD) considered as fixed effects; multiple  
1086 comparisons corrected by Tukey's method). All other comparisons under LMM between SST-Lypd6 no  
1087 MD, SST-GFP no MD, and SST-GFP 1d MD have  $P > 0.98$ . Data are mean $\pm$ SEM. (d) Frequency  
1088 distributions of firing rates in putative PV (pFS) interneurons, sorted by their narrow spike width, in adult  
1089 (>P60) mice. The firing rates across all groups were separated into 6 bins of 6 spikes/second. A  
1090 significantly higher distribution of visually evoked firing rates towards the lowest bin shows 1d MD  
1091 results in a decrease in visually evoked firing rate of pFS cells only when Lypd6 is overexpressed in  
1092 adult SST interneurons [SST-Lypd6 1d MD; n=7 mice, 170 cells] in comparison to non-Lypd6  
1093 overexpressing (SST-GFP) or non-deprived (no MD) groups: [SST-GFP 1d MD; n=5 mice, 148 cells]:  
1094 \*\*\* $P = 0.0009$ , [SST-Lypd6 no MD; n=4 mice 63 cells]: \* $P = 0.0454$ , [SST-GFP no MD; n=5 mice, 116  
1095 cells]: \* $P = 0.0160$ ,  $\chi^2$  tests were conducted based on actual cell numbers recorded. (e) Adult SST-cre



1096 mice overexpressing Lypd6 after 1d MD [SST-Lypd6 1d MD; n=7 mice] but no other groups [SST-GFP  
1097 1d MD, n=5 mice; SST-Lypd6 no MD, n=4 mice; SST-GFP no MD, n=5 mice] have significantly higher  
1098 fraction of pFS interneuron firing rate in the lowest bin (>0-6) in comparison to the bin above (>6-12):  
1099 \* $P=0.0136$ , Student's  $t$ -test. Data are mean $\pm$ SEM. **(f)** Schematic representation of V1 plasticity  
1100 paradigm by 4 days of monocular deprivation (4d MD) with viral injection. AAV8-GqDREADD was  
1101 injected into V1 binocular zone of adult (>P60) bigenic Lypd6Tg/PV-cre mice and incubated for >3  
1102 weeks prior to 4d MD. CNO (CNO+) or saline (CNO-) was given during the first day of 4d MD to  
1103 chemogenetically activate viral GqDREADD expressing PV interneurons for only 1 day. Following 4d  
1104 MD, extracellular recordings were performed for analysis of ocular dominance. **(g)** Chemogenetic  
1105 activation of PV interneurons during the first day of 4d MD through CNO delivery [CNO+: red, n=55  
1106 cells from 4 mice] results in a significant decrease in ocular dominance shift, but not when given saline  
1107 [CNO-: gray, n=42 cells from 3 mice]: \*\* $P=0.0030$ ,  $\chi^2$  test. **(h)** Cumulative plot of ocular dominance  
1108 index after adult 4d MD confirms decreased ocular dominance shift after 1 day-activation of PV  
1109 interneurons in CNO+ mice [red line, n=55 cells from 4 mice] compared with CNO- [gray line, n=42  
1110 cells from 3 mice]: \*\* $P=0.0054$ , K-S test. **(i)** Comparison of contralateral bias index (CBI) following 4d  
1111 MD in SST-cre mice injected with AAV-GqDREADD and administered either CNO [CNO+: red solid  
1112 bar, CBI=0.71; n=4 mice] or saline [CNO-: gray solid bar, CBI=0.57; n=3 mice] during the first day of 4d  
1113 MD: \* $P=0.0128$ , Student's  $t$ -test. Gray background area represents CBI range in a non-plastic mouse.  
1114 Data are mean $\pm$ SEM.

1115 **Supplementary Information**

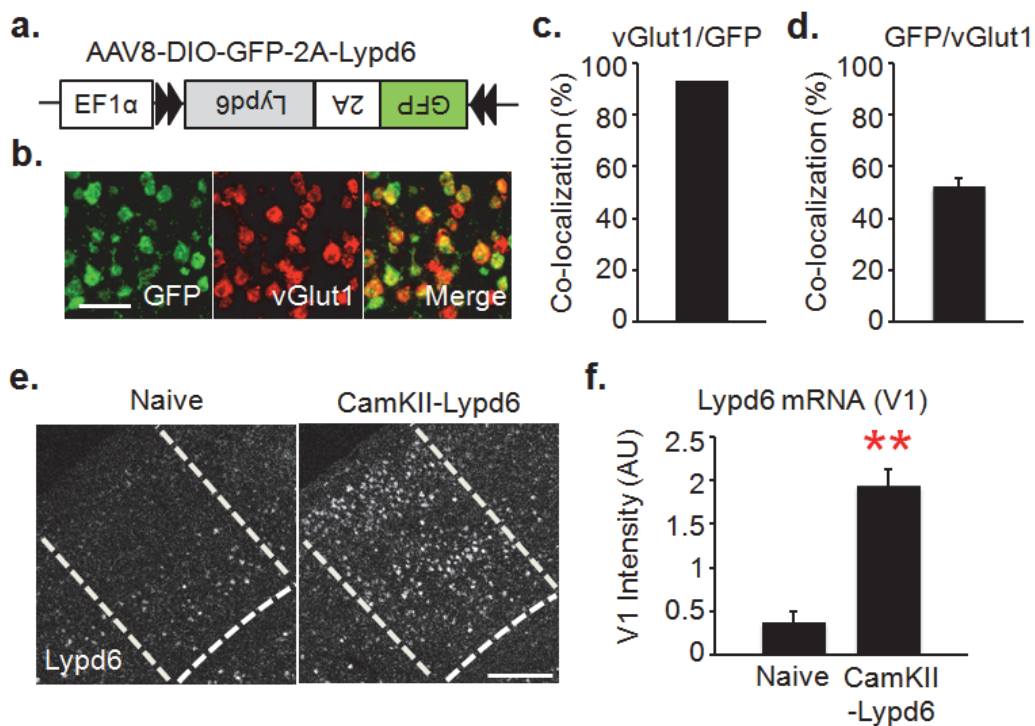

1116

1117 **Supplementary Figure 1 | Validation of over-expression of Lypd6 in glutamatergic V1 neurons.**

1118 **(a)** Schematic representation of adeno-associated viral Cre-dependent Lypd6 over-expression  
1119 construct. **(b)** Representative double *in situ* hybridization labeling of viral GFP following a cocktail  
1120 injection of AAV-DIO-GFP-Lypd6 and AAV-CamKII-Cre into V1 binocular zone shows specific  
1121 expression of GFP (green) in vGlut1 (red)-positive neurons. Scale bar=50 $\mu$ m. **(c)** 93.2 $\pm$ 1.6% of viral  
1122 GFP positive cells co-express vGlut1. [n=3 mice]. Data are mean $\pm$ SEM. **(d)** 52.2 $\pm$ 3% of vGlut1 positive  
1123 cells co-express viral GFP. [n=3 mice]. Data are mean $\pm$ SEM. **(e)** Representative images of fluorescent  
1124 *in situ* hybridization labeling of Lypd6 in V1 binocular zone from the non-injected control hemisphere  
1125 (naive) and the virus cocktail injected hemisphere (CamKII-Lypd6). V1 Binocular zone is outlined by  
1126 dashed white-line, based on Paxinos and Franklin's The Mouse Brain in Stereotaxic Coordinates  
1127 (1997). Scale bar=200 $\mu$ m. **(f)** Quantification of Lypd6 expression in V1 binocular zone from the CamKII-  
1128 Lypd6 and naïve hemispheres. Absolute intensity for every Lypd6 positive cells in the binocular V1 was  
1129 summed and the total value was subsequently divided by the  $\mu$ m<sup>2</sup> area of images of V1 binocular zone.

1130 Lypd6 expression is significantly higher in the CamKII-Lypd6 hemisphere in comparison to the naïve  
1131 hemisphere [5 sections from 2 mice]  $P=0.0049$ , Student's *t*-test for paired samples. Data are  
1132 mean $\pm$ SEM.

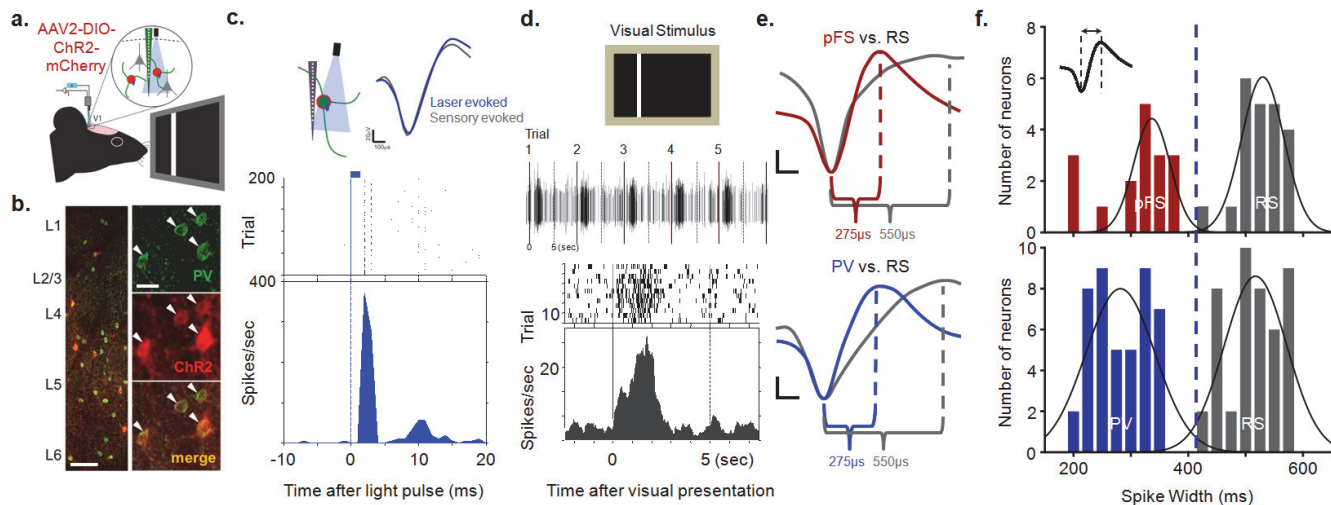

1133

1134

### Supplementary Figure 2 | Defining putative fast-spiking (pFS) cells based on optogenetic

1135

tagging of PV interneuron. pFS cells were defined by a criteria established from the spike width of

1136

optogenetically tagged PV interneurons. **(a-c)** Optogenetic tagging of PV interneurons. **(a)** Schematic

1137

representation of expression of adeno-associated viral Cre-dependent ChR2 expression construct

1138

(AAV-DIO-ChR2-mCherry) in PV interneurons of V1 binocular zone of PV-cre mice. **(b)** Representative

1139

images of robust viral mCherry labeling following injection of AAV-DIO-ChR2 into V1 binocular zone of

1140

PV-cre mice. Immunohistochemical labeling shows specific expression of ChR2/mCherry (red) in

1141

immunolabeled PV (green) interneurons. Left inset scale bar=100 $\mu$ m, right insets scale bar=25 $\mu$ m. **(c)**

1142

Example of optogenetically tagged PV interneuron showing time locked optogenetic activation. Laser

1143

(wavelength 473 nm, fiber diameter 105 $\mu$ m) was delivered using an optic fiber coupled to the 16-

1144

channel linear silicone probe. The fiber tip was positioned immediately above the recording site. PV+

1145

cells were identified with a light pulse (1msec, 1Hz) stimulus. **(d)** Example of visually evoked responses

1146

from a putative PV interneuron (putative fast spiking: pFS cell, in e and f) identified and sorted through

1147

optogenetic tagging method in c. Top trace represents a series of a single pFS cell's visually evoked

1148

responses after 5 consecutive trials of visual stimulus presentation (solid black line represents onset of

1149

visual stimulus and dotted line represents termination of visual stimulus). The middle raster plot

1150

represents the responses of the single pFS cell across all 12 trials. Bottom histogram is a result of

1151 peristimulus analysis of peak to baseline spike activity in response to the visual stimulus (solid line  
1152 represents onset of visual stimulus and dotted line represents termination of visual stimulus). **(e)** The  
1153 method for properly identifying PV interneurons without optogenetic tagging was based on a spike-  
1154 width-based criterion based on responses of optogenetically identified PV interneurons. Top: An  
1155 averaged visually evoked spike waveform of putative fast spiking (pFS, red) overlaid on a regular  
1156 spiking cell (RS, gray) waveform. Bottom: An averaged visually evoked spike waveform of  
1157 optogenetically-tagged PV+ cell (PV, blue) overlaid on a regular spiking cell (RS, gray) waveform.  
1158 Scale represents x:100ms, y: 20mV. Both pFS and PV waveforms have identical spike width duration  
1159 ( $275 \mu s$ ) in comparison to average RS waveform spike width duration ( $550 \mu s$ ). **(f)** A population of  
1160 pFS cells [red: 16 cells, 3 mice] were defined as the neurons whose spike-width (trough-to-peak time) is  
1161 under 412ms (blue line), which was based on the spike-width of optically tagged PV interneuron  
1162 recording [blue: 45 cells, 3 mice]. Firing rates of pFS cells are comparable to those of optically tagged  
1163 PV interneurons.  
1164

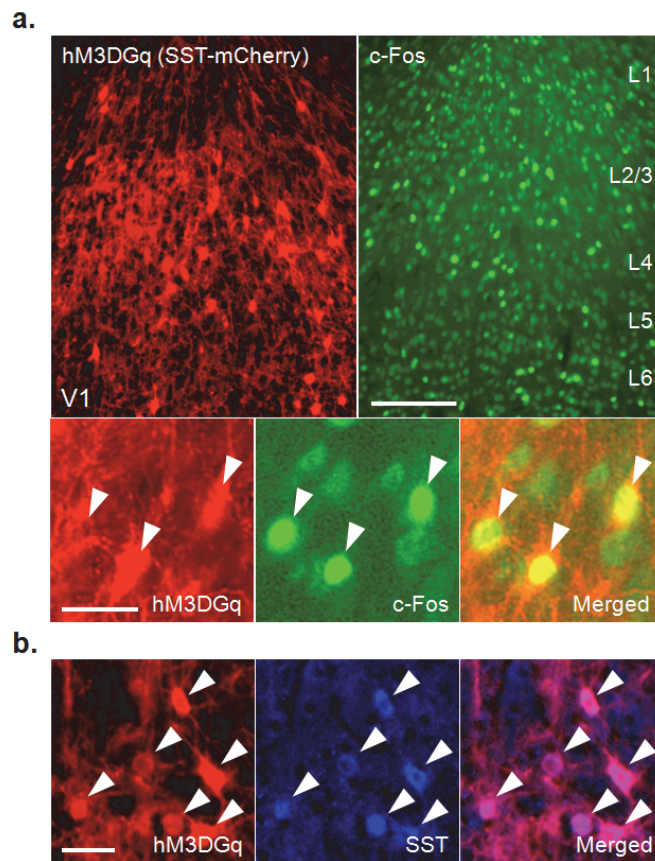

1165

1166

1167

1168

1169

1170

1171

1172

1173

**Supplementary Figure 3 | Validation of AAV-GqDREADD expression and chemogenetic activation of SST interneurons.** (a) Representative of c-fos activation (green) of AAV-GqDREADD infected SST interneurons. Scale bar=200 $\mu$ m. SST-cre mice virally injected with AAV8-GqDREADD in V1 binocular zone were perfused 90 minutes after CNO injection (0.6 mg/kg) to capture the neural activation. Note c-fos-positive cells (green) are restricted to the area where mCherry-positive cells (red) are clustered. Scale bar=50 $\mu$ m. (b) Representative images of viral mCherry labeling following injection of AAV-GqDREADD into V1 of SST-cre mice. Immunohistochemical labeling shows specific expression of GqDREADD/mCherry (red) in immunolabeled SST (blue) neurons. Scale bar=50 $\mu$ m.

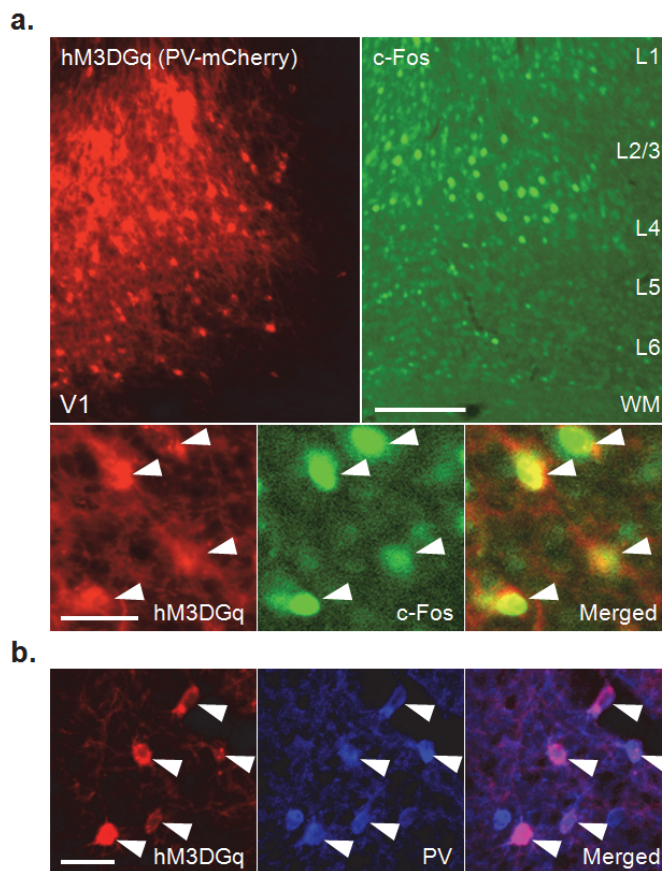

1174

1175 **Supplementary Figure 4 | Validation of AAV-GqDREADD expression and chemogenetic**

1176 **activation of PV interneurons. (a)** Representative of c-fos activation (green) of AAV-GqDREADD

1177 infected PV interneurons. Scale bar=200µm. PV-cre mice virally injected with AAV8-GqDREADD in V1

1178 binocular zone were perfused 90 minutes after CNO injection (0.6 mg/kg) to capture the neural

1179 activation. Note c-fos-positive cells (green) are restricted to the area where mCherry-positive cells (red)

1180 are clustered. Scale bar=50µm. **(b)** Representative images of viral mCherry labeling following injection

1181 of AAV-GqDREADD into V1 of PV-cre mice. Immunohistochemical labeling shows specific expression

1182 of GqDREADD/mCherry (red) in immunolabeled PV (blue) neurons. Scale bar=50µm.
